1 ***Medicago truncatula* Ferroportin2 mediates iron import into nodule symbiosomes**

2 Viviana Escudero<sup>a</sup>, Isidro Abreu<sup>a</sup>, Manuel Tejada-Jiménez<sup>a</sup>, Elena Rosa-Núñez<sup>a</sup>, Julia  
3 Quintana<sup>b</sup>, Rosa Isabel Prieto<sup>a</sup>, Camille Larue<sup>c</sup> Jianqi Wen<sup>d</sup>, Julie Villanova<sup>e</sup>, Kirankumar  
4 S. Mysore<sup>d</sup>, José M. Argüello<sup>b</sup>, Hiram Castillo-Michel<sup>f</sup> Juan Imperial<sup>g</sup>, Manuel González-  
5 Guerrero<sup>a,h,1</sup>

6 <sup>a</sup> Centro de Biotecnología y Genómica de Plantas (UPM-INIA), Universidad Politécnica de  
7 Madrid, 28223 Pozuelo de Alarcón (Madrid), Spain.

8 <sup>b</sup> Worcester Polytechnic Institute, Worcester MA01609, USA.

9 <sup>c</sup> EcoLab, Université de Toulouse, CNRS, Toulouse, France

10 <sup>d</sup> Noble Research Institute, Ardmore, OK73401, USA.

11 <sup>e</sup> ID16 Beamline. European Synchrotron Radiation Facility, Grenoble 38043, France.

12 <sup>f</sup> ID21 Beamline. European Synchrotron Radiation Facility, Grenoble 38043, France.

13 <sup>g</sup> Instituto de Ciencias Agrarias, Consejo Superior de Investigaciones Científicas, 28006  
14 Madrid, Spain.

15 <sup>h</sup> Escuela Técnica Superior de Ingeniería Agronómica, Alimentaria y de Biosistemas,  
16 Universidad Politécnica de Madrid, 28040 Madrid, Spain.

17

18 <sup>1</sup> Address correspondence to [manuel.gonzalez@upm.es](mailto:manuel.gonzalez@upm.es)

19

20 Short Title: MtFPN2 delivers iron to symbiosomes

21

22 The author responsible for distribution of materials integral to the findings presented in this  
23 article in accordance with the policy described in the Instruction for Authors  
24 ([www.plantcell.org](http://www.plantcell.org)) is: Manuel González-Guerrero (manuel.gonzalez@upm.es).

25

26

27 **ABSTRACT**

28 Iron is an essential cofactor for symbiotic nitrogen fixation. It is required by many of the  
29 enzymes facilitating the conversion of N<sub>2</sub> into NH<sub>4</sub><sup>+</sup> by endosymbiotic bacteria living  
30 within root nodule cells, including signal transduction proteins, O<sub>2</sub> homeostasis systems,  
31 and nitrogenase itself. Consequently, host plants have developed a transport network to  
32 deliver essential iron to nitrogen-fixing nodule cells. Model legume *Medicago truncatula*  
33 *Ferroportin2* (*MtFPN2*) is a nodule-specific gene that encodes an iron-efflux protein.  
34 *MtFPN2* is located in intracellular membranes in the nodule vasculature, and in the  
35 symbiosome membranes that contain the nitrogen-fixing bacteria in the differentiation and  
36 early-fixation zones of the nodules. Loss-of-function of *MtFPN2* leads to altered iron  
37 distribution and speciation in nodules, which causes a reduction in nitrogenase activity and  
38 in biomass production. Using promoters with different tissular activity to drive *MtFPN2*  
39 expression in *MtFPN2* mutants, we determined that *MtFPN2*-facilitated iron delivery  
40 across symbiosomes is essential for symbiotic nitrogen fixation, while its presence in the  
41 vasculature does not seem to play a major role in in the conditions tested.

42

43

44

45

46

47

48

49

50

51

52

53

## 54 INTRODUCTION

55 Iron is an essential cofactor for enzymes participating in almost every plant  
56 physiological process, including photosynthesis, respiration, and stress tolerance  
57 (Marschner, 2011). Consequently, when lacking, a plethora of iron-dependent processes is  
58 affected. Damaging as low iron levels are, so are slightly higher ones. In that situation, iron  
59 becomes toxic, catalysing the production of free radicals in Fenton-style reactions and  
60 competing with other essential metal nutrients for the active site of proteins (Goldstein et  
61 al., 1993; Lin et al., 2011). To maintain iron homeostasis within these narrow physiological  
62 levels, plants have developed a complex system to optimize iron uptake and delivery from  
63 soil, while preventing toxicity. This system involves metal transporters that recover this  
64 nutrient from soil and deliver it to shoots and seeds (Korshunova et al., 1999; Curie et al.,  
65 2001; Vert et al., 2002; Morrissey et al., 2009; Zhai et al., 2014), small soluble molecules  
66 that coordinate iron and keep it soluble in plant fluids (von Wiren et al., 1999; Rogers and  
67 Guerinot, 2002; Roschztardt et al., 2011; Flis et al., 2016), and a complex regulatory  
68 network (Colangelo and Guerinot, 2004; Long et al., 2010; Sivitz et al., 2012; Kumar et al.,  
69 2017; Grillet et al., 2018). While in most vegetative growing plants, the main iron sinks are  
70 the leaves, legumes may have additional ones in differentiated root organs known as  
71 nodules (Brear et al., 2013; González-Guerrero et al., 2014). Representing just 5% of the  
72 total biomass of the plant, nodules contain a large part of the plant iron content (González-  
73 Guerrero et al., 2014; Tejada-Jiménez et al., 2015). Therefore, it is to be expected that  
74 legumes have adapted their pre-existing iron homeostasis systems to accommodate nodule  
75 development and function.

76 Nodules are the result of the interaction between legumes and rhizobia, a diverse  
77 group of soil bacteria capable of converting, fixing,  $N_2$  into  $NH_4^+$  when in symbiosis  
78 (Downie, 2014). Following a complex signal exchange between the symbionts (Vernié et  
79 al., 2015), nodule primordia emerge from the roots by proliferation of pericycle and inner  
80 cortex cells (Xiao et al., 2014). While the nodule develops, rhizobia in the root surface are  
81 surrounded by a root hair that invaginates and directs, via an infection thread, the bacteria  
82 from the root exterior to the inner nodule regions (Gage, 2002), where they are released in  
83 an endocytic-like process (Limpens et al., 2009; Huisman et al., 2012). Within these  
84 pseudo-organelles (symbiosomes), rhizobia differentiate into bacteroids (Sutton et al.,

85 1981; Kereszt et al., 2011), and start fixing nitrogen, transferring fixed  $\text{NH}_3$  to the host  
86 plant in exchange for photosynthates and mineral nutrients (Udvardi and Poole, 2013).  
87 Nodules can be classified according to their development in determinate and indeterminate  
88 (Sprent, 2007). The former, as illustrated by soybean nodules, has a limited growth, while  
89 the later (developed by pea or *Medicago*), maintains the apical meristem and has a longer  
90 growth period. Due to this indeterminate nodule growth, four nodule zones are established,  
91 tracing along its length the developmental stages of nodule maturation. These zones are: the  
92 meristem (zone I), the zone where the nodule cells are infected by rhizobia and they  
93 differentiate into bacteroids (zone II), the  $\text{N}_2$  fixation zone (zone III), and in nodules of a  
94 certain age, the senescent zone (zone IV) (Vasse et al., 1990). In addition, some authors  
95 also differentiate an interzone between zones II and III in which  $\text{O}_2$  levels drop and  
96 nitrogenase is starting to be synthesized (Roux et al., 2014).

97 Nodule development is highly sensitive to iron levels, as suggested by its abundance  
98 in these organs. Iron deficiency limits nodule number and maturation, as well as reduces  
99 nitrogen fixation rates (O'Hara et al., 1988; Tang et al., 1990; Tang et al., 1992). This is the  
100 consequence of many of the key enzymes involved in nodulation and nitrogen fixation  
101 being ferroproteins synthesized at high levels (Brear et al., 2013; González-Guerrero et al.,  
102 2014). For instance, heme-containing NADPH-oxidases are important for nodule initiation  
103 and development (Montiel et al., 2012; Montiel et al., 2016). Nitrogenase, the critical  
104 enzyme for nitrogen fixation, is a protein complex with 34 iron atoms in the form of iron-  
105 sulfur (Fe-S) clusters and the unique iron-molybdenum cofactor (FeMoco) (Rubio and  
106 Ludden, 2005). This enzyme is irreversibly inhibited by  $\text{O}_2$ , while bacteroids must carry out  
107 an aerobic metabolism (Preisig et al., 1996b). To make both processes compatible, legumes  
108 express leghemoglobin (20% of the total nodule protein) which binds  $\text{O}_2$  with great affinity  
109 (Appleby, 1984). This oxygen can be recovered and used by high-affinity rhizobial  
110 cytochrome *c* oxidases (iron-copper proteins) (Preisig et al., 1996a; Preisig et al., 1996b). In  
111 addition, a number of other iron-proteins are required for free radical control, cofactor  
112 assembly, and general metabolic processes (Dalton et al., 1998; Rubio et al., 2004; Rubio  
113 and Ludden, 2005; González-Guerrero et al., 2014).

114 To ensure the reinforced iron supply that symbiotic nitrogen fixation requires,  
115 nodulation elicits the iron-deficiency response characteristic of dicots (Terry et al., 1991):

116 lowering the pH of the rhizosphere to increase Fe<sup>3+</sup> solubility, activating ferredoxin  
117 activities to reduce Fe<sup>3+</sup> to Fe<sup>2+</sup>, and inducing the expression of Fe<sup>2+</sup> importers of the ZIP  
118 (Zrt1-, Irt1-like Proteins) and Nramp (Natural Resistance Associated Macrophage Protein)  
119 transporter families (Andaluz et al., 2009; Kobayashi and Nishizawa, 2012). Once iron is in  
120 the plant, it symplastically or apoplastically reaches the endodermis from where it will be  
121 delivered by the vasculature to shoots and nodules. At the nodules, iron is released in the  
122 apoplast of the infection zone of the nodule (Rodríguez-Haas et al., 2013), where it is kept  
123 soluble as iron-citrate (Kryvoruchko et al., 2018), the most abundant complex in root to  
124 shoot iron transport and when transferring it across symplastically disconnected tissues  
125 (Durrett et al., 2007; Roschttardt et al., 2011). Iron uptake into the infected cells of  
126 *Medicago truncatula* is mediated primarily by MtNramp1, a transporter expressed in late  
127 zone II and interzone and located in the plasma membrane (Tejada-Jiménez et al., 2015).  
128 Transport into the symbiosomes is likely also facilitated by citrate, as indicated by the  
129 requirement of citrate efflux protein MtMATE67 (Kryvoruchko et al., 2018). However, this  
130 protein does not transport iron-citrate complexes, and therefore, another system must exist  
131 for iron translocation. Different candidates have been proposed to be responsible for iron  
132 delivery into the symbiosomes. The first was *Glycine max* Nramp protein GmDMT1  
133 (Kaiser et al., 2003). However, although this protein was located in symbiosomes, its  
134 direction of transport would be into the cytosol, as with all characterized Nramp proteins  
135 (Nevo and Nelson, 2006). VIT1-CCC1-like protein SEN1 is another candidate to carry out  
136 this role (Hakoyama et al., 2012), but although the direction in which iron is transported by  
137 these proteins would be compatible (Li et al., 2001), there is no definitive evidence of a  
138 symbiosome localization. Alternatively, a member of the ferroportin family (also known as  
139 IREG proteins) could also be involved.

140         Ferroportins are membrane proteins that extrude iron from the cytosol, either  
141 outside the cell or into organelle (Morrissey et al., 2009; Drakesmith et al., 2015). In plants,  
142 ferroportins have been associated to iron delivery into the xylem (Morrissey et al., 2009).  
143 Interestingly, this is a process that would be coupled to MATE-mediated citrate efflux  
144 (FRD3 in *A. thaliana*) (Durrett et al., 2007), as iron is kept soluble in the xylem as an iron-  
145 citrate complex (López-Millán et al., 2000; Durrett et al., 2007). Considering the functional  
146 association of ferroportins and citrate efflux proteins in the xylem, we hypothesized that a

147 similar relationship would be established between nodule-specific citrate efflux protein  
148 MtMATE67 and a ferroportin to deliver iron to nodule apoplast and to symbiosomes. As a  
149 result, we have identified and characterized MtFPN2 (*Medtr4g013240*), one of the three  
150 ferroportin-like genes encoded in the *M. truncatula* genome, and the only one with a  
151 nodule-specific expression. MtFPN2 is located in the intracellular compartments in the  
152 endodermis, and associated to symbiosomes in the infected cells. Mutation of *MtFPN2*  
153 results in a severe reduction of nitrogenase activity, and in mis-localization of iron in the  
154 nodules. These results support a role of MtFPN2 in iron delivery for symbiotic nitrogen  
155 fixation.

156

## 157 **RESULTS**

### 158 ***MtFPN2* is expressed in the nodule vasculature and interzone**

159 Three ferroportin-like sequences could be found in the genome of *M. truncatula*:  
160 *Medtr1g084140* (*MtFPN1*), *Medtr4g013240* (*MtFPN2*), and *Medtr4g013245* (*MtFPN3*).  
161 Among them, *MtFPN2* was the only ferroportin to have a nodule-specific transcription in  
162 the conditions tested (Figure 1A; Supplemental Figure 1). To determine the area of the  
163 nodule where *MtFPN2* was expressed, the 2,144 bp DNA region immediately upstream of  
164 *MtFPN2* start codon was used to drive the expression of the reporter  $\beta$ -glucuronidase (*gus*)  
165 gene. After 28 days-post-inoculation (dpi), GUS activity was detected in a specific nodule  
166 band close to the apical region, and in longitudinal bands along its major axis (Figure 1B).  
167 Longitudinal sections of nodules showed that the apical GUS-activity region corresponded  
168 to the late infection zone, interzone and early fixation zone (Figure 1C). Nodule cross  
169 sections showed GUS activity in the nodule vasculature (Figure 1D). In these cross  
170 sections, the lack of expression of *MtFPN2* in the matured fixation zone was also  
171 confirmed.

### 172 **MtFPN2-HA is located in vascular intracellular compartments and in the** 173 **symbiosomes**

174 Ferroportins have been associated to iron efflux from the cytosol (Kaplan, 2002).  
175 Their specific functional role is largely derived from the specific subcellular localization of

176 each protein. Should it be associated to the plasma membrane, its likely role would be iron  
177 export for long-distance trafficking, such as FPN1 in enterocytes, or FPN1 in endodermal  
178 cells (McKie et al., 2000; Morrissey et al., 2009). Alternatively, an intracellular localization  
179 associated to organelle would mean a role in iron storage or metalation of specific  
180 ferroproteins (Morrissey et al., 2009; Drakesmith et al., 2015). To determine the subcellular  
181 distribution of MtFPN2 and gain insights into its function, three hemagglutinin (HA)  
182 epitopes were fused to its C-terminus. The expression of this cassette was driven by the  
183 same region previously used for the *MtFPN2*<sub>prom::gus</sub> fusions. Protein localization was  
184 initially determined by confocal microscopy in which the epitopes were detected by an anti-  
185 HA monoclonal primary antibody and an Alexa594-conjugated (red) secondary antibody.  
186 To facilitate visualization, the transformed plants were inoculated with a GFP-expressing  
187 *Sinorhizobium meliloti* strain (green) and the sections stained with DAPI (blue) to visualize  
188 DNA. Figure 2A shows that MtFPN2-HA localization corresponded to the expression  
189 profile detected with the *MtFPN2*<sub>prom::gus</sub> fusions. A detailed view of the vascular region  
190 revealed that MtFPN2-HA was located in the endodermis, pericycle and in the vascular  
191 parenchyma, occupying large areas of the cytosol (Figure 2B). Visualization of infected  
192 cells in the differentiation zone also showed an intracellular localization of MtFPN2-HA,  
193 closely related to the symbiosomes (Figure 2C). To confirm this putative symbiosome  
194 localization, *M. truncatula* plants were transformed with a C-terminal GFP-fusion of  
195 *MtFPN2* driven by its own promoter and inoculated with a mCherry expressing *S. meliloti*.  
196 Symbiosomes isolated from these nodules showed co-localization of rhizobia and MtFPN2-  
197 GFP (Supplemental Figure 2). To further verify the symbiosome localization of MtFPN2-  
198 HA, a gold-conjugated secondary antibody was used to determine the distribution of HA-  
199 tagged proteins using transmission electron microscopy. As indicated by the confocal  
200 microscopy assays, gold particles were associated to symbiosome membranes (Figure 2D).  
201 The same approach showed gold particles concentrated in large intracellular membrane  
202 systems, very likely the endoplasmic reticulum in endodermal and vascular parenchyma  
203 cells (Figure 2D). To confirm that none of these observations were artifactual, controls for  
204 autofluorescence of the tagged proteins and specificity of the antibodies were carried out  
205 (Supplemental Figure 3).

206 **MtFPN2 is an iron efflux protein**

207 To confirm that MtFPN2 was capable of transporting iron, we tested its ability to  
208 restore the wild-type growth of a yeast mutant lacking the CCC1 protein. This transporter  
209 introduces excess cytosolic iron into the vacuole to prevent toxicity (Li et al., 2001). Loss  
210 of CCC1 function resulted in lower iron tolerance when the media was supplemented with  
211 2.5 mM FeSO<sub>4</sub>. However, when this strain was transformed with a plasmid expressing the  
212 coding sequence of *MtFPN2*, the sensitivity of the mutant strain to high iron was  
213 diminished (Figure 3), suggesting that MtFPN2 was able to participate in its detoxification.  
214 Addition of the HA-tag used for the immunolocalization studies did not affect MtFPN2  
215 activity in yeast (Supplemental Figure 4).

### 216 **MtFPN2 is required for nitrogenase activity in nodules**

217 Should MtFPN2 be responsible for iron delivery to the nodules, its mutation should  
218 lead to a reduction of nitrogenase activity, as a consequence of an iron-limited cofactor  
219 synthesis. To explore this possibility, the *Tnt1* insertion mutant NF11374 (*fpn2-1*) was  
220 obtained from the Noble Research Institute (Tadege et al., 2008). This line has an insertion  
221 in the fourth exon of *MtFPN2* (Figure 4A), resulting in no transcript being detected by RT-  
222 PCR. *MtFPN2* loss-of-function had no significant effect on plant growth or chlorophyll  
223 content when the plants had not been inoculated and nitrogen was provided as ammonium  
224 nitrate in the nutrient solution (Supplemental Figure 5). However, when the plants were  
225 inoculated and nitrogen had to be obtained from the endosymbiotic rhizobia, removing  
226 *MtFPN2* function led to severe growth reduction (Figure 4B). Nodule development was  
227 also altered, with a large portion (64%) of the nodules having white colour (Figure 4C, 4D),  
228 indicative of non-functionality. Closer observation of these nodules using either toluidine  
229 blue-stained sections or tomographic reconstructions from X-ray analyses, showed that the  
230 white *fpn2-1* nodules did not develop the fixation zones further than a few cell layers  
231 (Supplemental Figure 6), and that even the fewer nodules with a pink-colour had a reduced  
232 Zone III. In addition, the symbiosomes appeared disorganized in the cytosol of *fpn2-1*  
233 nodule cells, with a number of vacuoles, in contrast to the ordered, radial and peripheral  
234 distribution in the wild type plants. As expected by the plant and nodule phenotypes,  
235 biomass production was significantly lower in *fpn2-1* plants than in wild-type plants  
236 (Figure 4E). Nitrogen fixation capabilities (nitrogenase activity) of the mutant nodules were  
237 approximately 80% lower than those from wild-type plants (Figure 4F). These phenotypes



238 were the likely result of iron not reaching the nodules in high-enough levels, as indicated by  
239 the lower iron content of *fpn2-1* nodules (Figure 4G). Introducing into *fpn2-1* the coding  
240 sequence of *MtFPN2* regulated by the 2,144 bp region upstream its start codon restored the  
241 wild-type phenotype. However, fortifying the nutrient solution with additional iron did not  
242 have the same effect (Supplemental Figure 7).

243 Consistent with the phenotype arising from altered iron delivery to the nodules,  
244 synchrotron-based micro-X-ray fluorescence studies of wild-type and *fpn2-1* nodules  
245 showed altered distribution of this element (Figure 5A). *MtFPN2* mutation led to less iron  
246 being allocated to the early fixation zones of the nodules, in those cases where the region  
247 was marginally developed (pink *fpn2-1* nodules). In the case of fully white nodules, no iron  
248 distribution indicative of ordered symbiosomes (iron-rich ring-like structures) was  
249 observed, consistent with no functional zone III being fully developed. This alteration in  
250 iron distribution had an impact on iron speciation as determined by micro-X-ray Absorption  
251 Near-Edge Spectroscopy ( $\mu$ XANES) on nodule sections. Different iron spectra were  
252 obtained from wild-type and mutant nodules (Figure 5B). Principal component analyses of  
253 the obtained spectra in the infection/differentiation zone, fixation zone and vascular region  
254 showed great iron speciation variation between wild-type and white *fpn2-1* nodules (Figure  
255 5B). Interestingly, iron speciation in pink *fpn2-1* nodules showed an intermediate state  
256 midway from wild-type and white *fpn2-1* nodules. Although the complex iron speciation in  
257 nodules and the lack of a suitable number of spectra from many of these forms precludes a  
258 detailed description of the precise chemical species present in these organs, it was  
259 interesting to notice that the proportion of iron coordinated by sulfur (Fe-S clusters,  
260 including the iron-molybdenum cofactor of nitrogenase) was different in wild type, pink  
261 *fpn2-1*, and white *fpn2-1* nodules (Supplemental Table 1).

262 Considering the dual localization of *MtFPN2* in the vasculature and in the  
263 symbiosomes, the reported phenotypes could be due to either iron not being released from  
264 the vessels and/or from it not getting across the symbiosome membrane. In an attempt to  
265 separate both causes, *MtFPN2* coding sequence was cloned under the *MtMOT1.3* promoter,  
266 a nodule-specific gene that we had previously located in the interzone and early fixation  
267 zone (Tejada-Jiménez et al., 2017). Mutants *fpn2-1* were transformed with this construct to  
268 test whether expressing *MtFPN2* only in the nodule cortex was sufficient to restore the

269 phenotype. As shown in Figure 6, *MOT1.3<sub>prom</sub>* driven expression of *MtFPN2* resulted in a  
270 partial improvement of plant growth (Figure 6A), with the development of functional pink  
271 nodules in significantly higher numbers than *fpn2-1* (Figures 6B and C). Overall, these  
272 plants showed improved biomass production compared to *fpn2-1* (Figure 6D), albeit not  
273 enough to reach wild-type levels. The improved iron delivery to *fpn2-1* led to significantly  
274 higher nitrogen fixation rates per nodule (Figure 6E). In contrast, when *MtFPN2* expression  
275 was driven by the promoter of vascular gene *MtNOOT1* (Magne et al., 2018), no significant  
276 differences were observed in terms of biomass production, nodule development, or  
277 nitrogenase activity with those that do not express it at all (Supplemental Figure 8).

278

## 279 **DISCUSSION**

280 Symbiotic nitrogen fixation carried out by the legume-rhizobia systems is one of the  
281 main sources of assimilable nitrogen in natural ecosystems and in agrosystems (Vance,  
282 2001; Herridge et al., 2008). A key element in crop rotation strategies to increase nitrogen  
283 content in soils, symbiotic nitrogen fixation can minimize the use of polluting and  
284 expensive nitrogen fertilizers. Unveiling the molecular bases of this process is critical to  
285 improve nitrogen fixation rates and to introduce these capabilities to non-legume crops  
286 (Oldroyd and Dixon, 2014; Mus et al., 2016). However, for symbiotic nitrogen fixation to  
287 be efficiently used in sustainable agriculture or to extend it to other systems, close attention  
288 has to be paid to the mechanisms of delivery of essential, limiting nutrients, such as iron.

289 Nitrogen fixation, oxygen homeostasis, reactive oxygen species production and  
290 control, and several other nodule physiological processes rely on iron (Brear et al., 2013;  
291 González-Guerrero et al., 2014; González-Guerrero et al., 2016), a limiting nutrient in large  
292 areas of the world (Hirschi, 2009; White and Broadley, 2009). Therefore, nodules must  
293 ensure a steady supply of this element. While free-living diazotrophs can obtain iron  
294 directly from soil, endosymbiotic ones must obtain it from the host (Rodríguez-Haas et al.,  
295 2013; Udvardi and Poole, 2013). This process was likely adapted from the pre-existing  
296 long-distance iron transport systems. Consequently, we might expect similar mechanisms  
297 to those dedicated for iron delivery to the shoots, with the added handicap of the nodules  
298 becoming a second sink of an already scarce nutrient. Further supporting this hypothesis is

299 the existence of a nodule-specific iron-regulated citrate efflux protein that showcases the  
300 importance of iron-citrate complexes in apoplastic iron solubility and in iron supply to  
301 symbiosomes (Kryvoruchko et al., 2018). Since ferroportins were associated to citrate-  
302 mediated long-distance iron supply (Morrissey et al., 2009), we speculated on a putative  
303 role for these proteins in symbiotic nitrogen fixation.

304 Model legume *M. truncatula* encodes three ferroportin-like proteins. One of them,  
305 MtFPN1, closely resembles the Mar1 protein located in the chloroplasts of Arabidopsis,  
306 that plays an undefined role in iron homeostasis in plants, as well as serving as entry-point  
307 for antibiotics (Conte et al., 2009). Similarly to *Mar1*, *MtFPN1* was expressed in the whole  
308 plant. The other two are orthologues to *A. thaliana* FPN1 and FPN2. While *MtFPN3* was  
309 expressed in most plant organs, *MtFPN2* transcripts were only detected in two discrete  
310 nodule regions: associated to the nodule vasculature, and from late Zone II to early Zone  
311 III. This dual localization indicates a dual function related with iron efflux from the cytosol,  
312 as inferred from the yeast complementation assays and from the available information on  
313 the biochemistry of this family of transporters.

314 In the vasculature, MtFPN2 would introduce iron into the lumen of an  
315 endomembranous compartment. Considering the relatively large amount of iron that has to  
316 be transferred across the nodule vessels into the nodules (González-Guerrero et al., 2014;  
317 González-Guerrero et al., 2016), it could be argued that the endomembranes would serve as  
318 an iron buffer, storing it prior to being delivered to the apoplast of the infection zone or to  
319 be recycled back to the host in older parts of the nodule. It could also be hypothesized that  
320 the iron concentrated in intracellular compartments could be released in the apoplast by  
321 exocytosis, as it has been proposed for phosphate transport mediated by the PHO1 protein  
322 (Arpat et al., 2012). It is unlikely that MtFPN2 would participate in a direct translocation of  
323 iron from the cytosol across the plasma membrane, since no signal was observed using  
324 immunolocalization and transmission electron microscopy. In contrast, the localization of  
325 MtFPN2 in the symbiosome provides a clear insight into a key function for MtFPN2:  
326 mediating iron delivery to the bacteroids.

327 Several evidences in addition to the expression and localization data support this  
328 role. Loss of *MtFPN2* function leads to a reduction of nitrogen fixation capabilities, with

329 negative effects on plant growth, biomass production, and nodule development.  
330 Nitrogenase activity is highly dependent on iron delivery, due to its large requirements of  
331 iron for its three cofactors (Rubio and Ludden, 2005). Altering iron uptake by rhizobia-  
332 infected nodule cells presented a similar phenotype, as shown when characterizing the  
333 *nramp1-1 M. truncatula* mutant (Tejada-Jiménez et al., 2015). In addition, iron delivery to  
334 *fpn2-1* nodules is affected in terms of total concentration, distribution in the nodule, and  
335 speciation, indicating a large disturbance in nodule iron homeostasis. Altered nodule  
336 development has also been reported when legumes were grown in iron-deficient substrates  
337 (O'Hara et al., 1988; Tang et al., 1990; Tang et al., 1992), or when iron delivery was altered  
338 by mutating iron transporters (Hakoyama et al., 2012; Tejada-Jiménez et al., 2015), or the  
339 iron-chelation system (Stephens et al., 2011; Kryvoruchko et al., 2018). The changes in iron  
340 speciation in *fpn2-1* nodules would be the consequence of several factors: i) iron being  
341 stored or retained by iron-detoxification systems as a consequence of not reaching the  
342 proper acceptors, ii) loss of signal from ferro-proteins that have not received their cofactor,  
343 iii) mismetallation of proteins due to iron being retained in different compartments.  
344 Although attempts were made to fit the spectra obtained with different iron-complex  
345 reference standards, the complexity and number of these species made it extremely difficult  
346 to conclude anything other than a reduction of iron-sulfur species in nodules, which would  
347 very likely include the iron-sulfur clusters of nitrogenase. This phenotype was stronger in  
348 white non-functional nodules, but also present in those with wild type colour, a leaky  
349 phenotype that was also observed with *MtNramp1* mutants (Tejada-Jiménez et al., 2015)  
350 and that might indicated the existence of secondary systems able to deliver, with low  
351 affinity or non-specifically, some iron for nitrogen fixation in nodules.

352         The roles of MtFPN2 in the vasculature and in the symbiosomes were not equally  
353 important. Expressing *MtFPN2* only in the nodule cortical cells was enough to at least  
354 partially restore the wild-type phenotype. This means that facilitating iron transport across  
355 the symbiosome membrane would be the key function of MtFPN2. In contrast, when  
356 *MtFPN2* was only expressed in the vasculature, no significant improvements in plant  
357 growth, nodule development, or nitrogenase activity were observed compared to the *fpn2-1*  
358 nodules. This would also hint at the existence of mechanisms to deliver iron out of the  
359 vessels that are independent of MtFPN2. In contrast, in the symbiosomes, MtFPN2 would

360 not be easily substituted by another iron transporter, including MtSEN1, which has also  
361 been hypothesized to be in this membrane (Hakoyama et al., 2012). This would also  
362 explain why the attempts to functionally complement *fjn2-1* by increasing iron content in  
363 the nutrient solution did not work, since it would require to: i) accumulate at high enough  
364 levels in the cell cytosol to overcome MtFPN2 absence without becoming toxic, and ii)  
365 recruit another transporter that might use iron as a substrate although at lower affinities.

366 Overall, we now have a better understanding of the mechanisms of iron delivery for  
367 symbiotic nitrogen fixation. Iron would be delivered by the vessels into the apoplast of the  
368 infection/differentiation zone of the nodule (Rodríguez-Haas et al., 2013). Iron release from  
369 the vessels would be facilitated by MtFPN2 and some other unknown protein(s). Once in  
370 the apoplast, it would form a complex with the citrate released by MtMATE67  
371 (Kryvoruchko et al., 2018). Then, a yet-to-be-determined ferredoxinase must work to  
372 convert  $Fe^{3+}$  into  $Fe^{2+}$  that is the substrate of MtNramp1, the protein responsible for iron  
373 uptake by rhizobia-infected nodule cells (Tejada-Jiménez et al., 2015). Once in the cytosol,  
374 iron will be sorted to different subcellular compartments. In the case of the symbiosome,  
375 MtMATE67 would also be required to form the iron-citrate complexes that seem to be the  
376 preferred iron species to be taken up by bacteroids (Moreau et al., 1995; Le Vier et al.,  
377 1996).

378

## 379 **METHODS**

### 380 **Biological material and growth conditions**

381 *M. truncatula* R108 and *fjn2-1* seeds were scarified in concentrated sulfuric acid for  
382 7.5 min (R108) or 6.5 min (*fjn2-1*). Excess acid was removed and washed away eight times  
383 with cold water, followed by surface-sterilization in 50 % (v/v) bleach for 90 s. Sterilized  
384 seeds were embedded in sterile water overnight in darkness. Seeds were stratified in water-  
385 agar plates for 48 h at 4 °C and germinated at 22 °C. Seedlings were planted on sterile  
386 perlite pots, and inoculated with *S. meliloti* 2011 or the same bacterial strain transformed  
387 pHc60-GFP (Cheng and Walker, 1998). Plants were grown in a greenhouse under 16 h  
388 light / 8 h dark at 25 °C / 20 °C conditions. In the case of perlite pots, plants were watered  
389 every two days with Jenner's solution or water alternatively (Brito et al., 1994). Nodulated

390 plants were harvested at 28 dpi. For hairy-root transformation experiments, *M. truncatula*  
391 seedling were transformed with *Agrobacterium rhizogenes* strain ARqua1, containing the  
392 appropriate binary vector as described (Boisson-Dernier et al., 2001).

393 Yeast complementation assays were carried out using the *S. cerevisiae* strain *ccc1*  
394 (MATa *ade2-1 his3-11 leu2-3,112, trp1-1, ura3-52 can1-100, ccc1::his3*) and parental  
395 DY150 (MATa *ade2-1 his3-11 leu2-3,112, trp1-1, ura3-52 can1-100*). The strains were  
396 grown in synthetic dextrose (SD) medium, supplemented with the required auxotrophic  
397 nutrients, 2 % glucose as carbon source, and the iron concentration indicated in each  
398 particular plate.

### 399 **RNA Extraction and RT-qPCR**

400 RNA was obtained from 28 dpi plants or equivalent age non-inoculated plants using  
401 Tri-Reagent (Life Technologies), treated with DNase turbo (Life Technologies), and  
402 cleaned with RNeasy Mini kit (Qiagen). Samples were tested for possible DNA  
403 contamination by PCR using the RNA samples as templates and primers specific for *M.*  
404 *truncatula Ubiquitin carboxyl-terminal hydrolase (Medtr4g077320.1)* (Supplemental Table  
405 2). RNA integrity was confirmed by electrophoresis. cDNA was synthesized from 500 ng  
406 of DNA-free RNA using PrimeScript RT reagent Kit (Takara), supplemented with RNase  
407 out (Life Technologies).

408 Expression studies were carried out by real-time reverse transcription polymerase  
409 chain reaction (RT-qPCR) using the StepOne plus thermocycler (Applied Biosystems),  
410 using the Power SyBR Green master mix (Applied Biosystems). The primers used are  
411 indicated in Supplemental Table 2. RNA levels were standardized using the *M. truncatula*  
412 *Ubiquitin carboxyl-terminal hydrolase (Medtr4g077320.1)* gene. Real time cycler  
413 conditions have been previously described (González-Guerrero et al., 2010). The threshold  
414 cycle (Ct) was determined in triplicate from three different assays, each with at least pooled  
415 material from three different plants). The relative levels of expression were determined  
416 using the  $2^{\Delta C_t}$  method. All assays contained a non-RT control to detect possible DNA  
417 contaminations.

### 418 **Yeast complementation assays**

419 Restriction sites *PstI* and *XhoI* were added to *MtFPN2* cDNA by PCR using the  
420 primers listed in Supplemental Table 2. The amplicon was inserted into the *PstI/XhoI* sites  
421 of yeast expression vector pDR196 and cloned using T4 ligation. Yeast strains were  
422 transformed with either the empty pDR196 or pDR196::*MtFPN2* using the lithium acetate  
423 method (Schiestl and Gietz, 1989) and selected by uracil autotrophy. Complementation  
424 assays were carried out in SD medium plates with the required auxotrophic nutrients. To  
425 test tolerance to iron, the plates were supplemented with 2.5 mM FeSO<sub>4</sub>.

#### 426 **GUS Staining**

427 *MtFPN2* promoter region was obtained by amplifying the 2144 pb upstream of the  
428 start codon using the primers Forward MtFPN2p-GW and Reverse MtFPN2p-GW  
429 (Supplemental Table 2). The amplicon was cloned in pDONR2017 (Invitrogen) by  
430 Gateway Technology (Invitrogen) and transferred to destination vector pGWB3 (Nakagawa  
431 *et al.*, 2007). Hairy-root transformation of *M. truncatula* seedling was carried out as  
432 indicated above. After three weeks on Fahreus medium supplemented with 50 µg/ml  
433 kanamycin, the transformed plants were transferred to sterilized perlite pots and inoculated  
434 with *S. meliloti* 2011. GUS activity was determined in root and nodules of 28 dpi plants as  
435 described (Vernoud *et al.*, 1999).

#### 436 **Immunolocalization studies**

437 The coding sequence region of *MtFPN2* and the promoter region used in the GUS  
438 staining were fused by PCR using the primers indicated in Supplemental Table 2. This  
439 fragment was cloned in pDONR207 (Invitrogen) using Gateway Technology and  
440 transferred to pGWB13 (three HA epitopes fused in C-terminus) (Nakagawa *et al.*, 2007).  
441 Hairy-root transformation was carried out as described previously (Boisson-Dernier *et al.*,  
442 2001). Transformants were inoculated with *S. meliloti* 2011 containing the pHc60 plasmid  
443 that constitutively expressed GFP. Nodules and roots were collected at 28 dpi.

444 Samples for immunolocalization with a confocal microscope were fixed in 4%  
445 paraformaldehyde, 2.5 % sucrose in phosphate-buffered saline (PBS) solution at 4 °C  
446 overnight (12 – 16 h). Fixative was removed and samples washed twice. Nodule and roots  
447 were included in 6 % agarose and then sectioned in a Vibratome 1000 Plus (Vibratome) in  
448 100 - 150 µm thick slices. Sections were dehydrated by serial incubation with methanol (30

449 %, 50 %, 70 % and 100 % in PBS) for 5 min and then rehydrated following the same  
450 methanol series in reverse order. Cell wall permeabilization was carried out by incubation  
451 with 2 % cellulase in PBS for 1 h and 0.1 % Tween 20 for 15 min. Sections were blocked  
452 with 5 % bovine serum albumin (BSA) in PBS and then incubated with 1:50 anti-HA  
453 mouse monoclonal antibody (Sigma) in PBS at room temperature for 2 h. Primary antibody  
454 was washed three times with PBS for 15 min and subsequently incubated with 1:40 Alexa  
455 594 - conjugated anti-mouse rabbit monoclonal antibody (Sigma) in PBS at room  
456 temperature for 1 h. Secondary antibody was washed three times with PBS for 10 min, and  
457 then DNA was stained using DAPI. Images were obtained with a confocal laser-scanning  
458 microscope (Leica SP8) using excitation light at 488 nm and 561 nm for GFP and Alexa  
459 594, respectively. DAPI-stained zones were visualized with UV light.

460 Immunolocalization in an electron microscope was carried out with 28 dpi nodules  
461 from MtFPN2-HA expressing plants fixed in 1 % formaldehyde, 0.5 % glutaraldehyde,  
462 2.5% sucrose in 50 mM potassium phosphate buffer (pH 7.4) at 4 °C for 14 – 16 h in gentle  
463 agitation. Samples were dehydrated with ethanol series and embedded in LR-White resin  
464 (London Resin Company Ltd, UK). Nodule were placed in gelatine capsules, filled with  
465 LR-White resin and polymerized at 60 °C for 24 h. Serial ultrathin sections were cut using a  
466 diamond knife in a Reichert Ultracut S Ultramicrotome (Leica). Sections for  
467 immunolocalization were blocked with 2 % BSA on PBS for 30 min, then incubated with  
468 1:50 anti-HA rabbit monoclonal antibody (Sigma) in PBS at room temperature for 3 h.  
469 Primary antibody was washed ten times with PBS for 2 min and next incubated with 1:150  
470 anti-rabbit goat monoclonal antibody conjugated to 15 nm gold particles (Fisher Scientific)  
471 in PBS at room temperature for 1 h. Secondary antibody was washed ten times with PBS  
472 for 2 min, after that samples were washed fifteen times with water for 2 min. Sections were  
473 stained with 2 % uranyl acetate and visualized in a JEM 1400 electron microscope at 80 kV  
474 at Centro Nacional de Microscopía Electrónica.

#### 475 **Acetylene reduction assays**

476 The acetylene reduction assay was used to measure nitrogenase activity in 28 dpi  
477 plants (Hardy et al., 1968). Wild type and *fpn2-1* roots with nodules were introduced in 30  
478 ml vials fitted with rubber stoppers. Each tube contained four or five independently



479 transformed plants. Three milliliters of air of each bottle was replaced by the same volume  
480 of acetylene. The vials were incubated for 30 min at room temperature, when 0.5 ml gas  
481 samples were taken from each of the tube. Ethylene content in each sample was measured  
482 in a Shimadzu GC-8A gas chromatograph using a Porapak N column. The amount of the  
483 ethylene produced was determined by measuring the height of the ethylene peak relative to  
484 standards.

#### 485 **Metal content determination**

486 Iron content was determined in shoots, roots, and nodules 28 dpi. Plant tissues were  
487 weighted and mineralized in 15.6 M HNO<sub>3</sub> (trace metal grade) for 1 h at 80 °C and  
488 overnight at 20 °C. Digestions were completed with 2 M H<sub>2</sub>O<sub>2</sub>. Samples were diluted in  
489 300 mM HNO<sub>3</sub> prior to measurements. Element analyses were performed with Atomic  
490 Absorption Spectroscopy (AAS) in an AAnalyst 800 (Perkin Elmer), equipped with a  
491 graphite furnace. All samples were measured in duplicate.

#### 492 **Synchrotron-based X-ray fluorescence and XANES**

493  $\mu$ XRF hyperspectral images and  $\mu$ XANES spectra were acquired on the beamline  
494 ID21 of the European Synchrotron Radiation Facility (Cotte et al., 2017), at 110 K in the  
495 liquid nitrogen (LN<sub>2</sub>) cooled cryostat of the Scanning X-ray Micro-spectroscopy end-  
496 station. A nodule from each of at least five *M. truncatula* R108 or *fpn2-1* plants (totalling  
497 five R108 nodules, five pink *fpn2-1* nodules, and five white *fpn2-1* nodules) were  
498 embedded into OCT medium and cryo-fixed by plunging in isopentane chilled with LN<sub>2</sub>.  
499 25  $\mu$ m-thick sections of frozen samples were obtained using a Leica LN22 cryo-microtome  
500 and accommodated in a Cu sample holder cooled with LN<sub>2</sub>, sandwiched between Ultralene  
501 (SPEX SamplePrep) foils. The beam was focused to 0.4 $\times$ 0.9  $\mu$ m<sup>2</sup> with a Kirkpatrick-Baez  
502 (KB) mirror system. The emitted fluorescence signal was detected with energy-dispersive,  
503 large area (80 mm<sup>2</sup>) SDD detector equipped with Be window (XFlash SGX from RaySpec).  
504 Images were acquired at the fixed energy of 7.2 keV, by raster-scanning the sample in the  
505 X-ray focal plane, with a step of 2 $\times$ 2  $\mu$ m<sup>2</sup> or 0.5 $\times$ 0.5  $\mu$ m<sup>2</sup> and 100 ms dwell time.  
506 Elemental mass fractions were calculated from fundamental parameters with the PyMca  
507 software package, applying pixel-by-pixel spectral deconvolution to hyperspectral maps  
508 normalized by the incoming current (Sole et al., 2007). The incoming flux was monitored

509 using a drilled photodiode previously calibrated by varying the photon flux at 7.2 KeV  
510 obtaining a response of 1927.9 charges/photon with a linear response up to 200 kcps. In  
511 PyMCA the incoming flux and XRF detector parameters were set to  $2 \times 10^9$  photons/s,  
512  $0.7746 \text{ cm}^2$  active area, and 4.65 cm sample to XRF detector distance. Sample matrix was  
513 assumed to be amorphous ice (11% H, 89% O, density  $0.92 \text{ g/cm}^3$ ), the sample thickness  
514 set at  $25 \mu\text{m}$  obtained with the use of a cryo-microtome.

515 Fe-K edge (7.050 to 7.165 keV energy range, 0.5 eV step) micro X-ray absorption  
516 near edge spectroscopy ( $\mu\text{XANES}$ ) spectra were recorded in regions of interest of the  
517 fluorescence maps on ID21 beamline (ESRF, France). Individual spectra were processed  
518 using Orange software with the Spectroscopy add-on (Demsar et al., 2013). The pre-  
519 processing step consisted of vector normalization and a second derivative Savitsky-Golay  
520 filter to highlight potential differences among genotypes. Then a principal component  
521 analysis combined to a linear discriminant analysis (when there were more than two  
522 conditions to compare) was performed on the second derivative of the spectra to highlight  
523 potential differences among genotypes. Average spectra from the regions was then fitted  
524 using a linear combination routine

525

## 526 **Statistical tests**

527 Data were analyzed by t-test to calculate statistical significance of observed  
528 differences, between wild type plants and analyzed mutants. Test results with p-values  
529 lower than 0.05 were considered as statistically significant.

530

## 531 **ACKNOWLEDGEMENTS**

532 This research was funded by a Ministerio de Economía y Competitividad grant (AGL2015-  
533 65866-P), and a European Research Council Starting Grant (ERC-2013-StG-335284), to  
534 MGG. Development of *M. truncatula Tnt1* mutant population was, in part, funded by the  
535 National Science Foundation, USA (DBI-0703285) to KSM. The X-ray experiments were  
536 performed on beamline ID21 and ID16B at the European Synchrotron Radiation Facility  
537 (ESRF), Grenoble, France. We are grateful to Juan Reyes-Herrera at the ESRF for his  
538 assistance in using beamline ID21. We would also like to acknowledge the other members

539 of laboratory 281 at Centro de Biotecnología y Genómica de Plantas (UPM-INIA) for their  
540 support and feedback in preparing this manuscript.

541

## 542 AUTHOR CONTRIBUTION

543 VE carried out most of the experimental work. IA, CL, JV, and HC-M generated the  
544 synchrotron-based X-ray fluorescence, XANES, and X-ray tomographic data. JQ and JMA  
545 were responsible for metal determinations. MT-J and ER-N executed the yeast  
546 complementation assays. RP participated in *M. truncatula* transformation assays. JW and  
547 KSM performed *M. truncatula* mutant screening and isolated the *fpn2-1* allele. VE, JI, and  
548 MG-G were responsible for experimental design, data analyses, and wrote the manuscript.

549

## 550 REFERENCES

- 551 **Akkermans, M.D., van der Horst-Graat, J.M., Eussen, S.R.B.M., van Goudoever, J.B.,**  
552 **and Brus, F.** (2016). Iron and Vitamin D deficiency in healthy young children in  
553 Western-Europe despite current nutritional recommendations. *J. Pediatr.*  
554 *Gastroenterol. Nutr.* **62**, 635-642
- 555 **Andaluz, S., Rodríguez-Celma, J., Abadía, A., Abadía, J., and López-Millán, A.F.**  
556 (2009). Time course induction of several key enzymes in *Medicago truncatula* roots  
557 in response to Fe deficiency. *Plant Physiol. Biochem.* **47**, 1082-1088.
- 558 **Appleby, C.A.** (1984). Leghemoglobin and *Rhizobium* respiration. *Annu. Rev. Plant*  
559 *Physiol.* **35**, 443-478.
- 560 **Arpat, A.B., Magliano, P., Wege, S., Rouached, H., Stefanovic, A., and Poirier, Y.**  
561 (2012). Functional expression of PHO1 to the Golgi and trans-Golgi network and its  
562 role in export of inorganic phosphate. *Plant J.* **71**, 479-491.
- 563 **Boisson-Dernier, A., Chabaud, M., Garcia, F., Bécard, G., Rosenberg, C., and Barker,**  
564 **D.G.** (2001). *Agrobacterium rhizogenes*-transformed roots of *Medicago truncatula*  
565 for the study of nitrogen-fixing and endomycorrhizal symbiotic associations. *Mol.*  
566 *Plant Microbe Interact.* **14**, 695-700.
- 567 **Brear, E.M., Day, D.A., and Smith, P.M.C.** (2013). Iron: an essential micronutrient for  
568 the legume–rhizobium symbiosis. *Front. Plant Sci.* **4**, 359.

- 569 **Brito, B., Palacios, J.M., Hidalgo, E., Imperial, J., and Ruíz-Argüeso, T.** (1994). Nickel  
570 availability to pea (*Pisum sativum* L.) plants limits hydrogenase activity of  
571 *Rhizobium leguminosarum* bv. *viciae* bacteroids by affecting the processing of the  
572 hydrogenase structural subunits. *J. Bacteriol.* **176**, 5297-5303.
- 573 **Catalano, C.M., Czymmek, K.J., Gann, J.G., and Sherrier, D.J.** (2006). *Medicago*  
574 *truncatula* syntaxin SYP132 defines the symbiosome membrane and infection  
575 droplet membrane in root nodules. *Planta* **225**, 541-550.
- 576 **Cheng, H.P., and Walker, G.C.** (1998). Succinoglycan is required for initiation and  
577 elongation of infection threads during nodulation of alfalfa by *Rhizobium meliloti*. *J.*  
578 *Bacteriol.* **180**, 5183-5191.
- 579 **Colangelo, E.P., and Guerinot, M.L.** (2004). The essential basic helix-loop-helix protein  
580 FIT1 is required for the iron deficiency response. *Plant Cell* **16**, 3400-3412.
- 581 **Colangelo, E.P., and Guerinot, M.L.** (2006). Put the metal to the petal: metal uptake and  
582 transport throughout plants. *Curr. Opin. Plant Biol.* **9**, 322-330.
- 583 **Conte, S., Stevenson, D., Furner, I., and Lloyd, A.** (2009). Multiple antibiotic resistance  
584 in Arabidopsis is conferred by mutations in a chloroplast-localized transport protein.  
585 *Plant Physiol.* **151**, 559.
- 586 **Cotte, M. P. E., Salomé, M. Rivard, C. Nolf, W. D., Castillo-Michel, H., Fabris, T.,**  
587 **Monico, L., Janssens, K., Wang, T., Sciau, P., Verger, L., Cormier, L.,**  
588 **Dargaud, O., Brun, E., Bugnazet, D., Fayard, B., Hesse, B., del Real, A. E. P.,**  
589 **Veronesi, G., Langlois, J., Balcar, N., Vandenberghe, Y., Solé, V. A., Kieffer, J.,**  
590 **Barrett, R., Cohen, C., Cornu, C., Baker, R., Gagliardini, E., Papillon, E.,**  
591 **Susini, J.** (2017). The ID21 X-ray and infrared microscopy beamline at the ESRF:  
592 status and recent applications to artistic materials. *J. Anal. At. Spectrom.* **32**, 477-  
593 493.
- 594 **Curie, C., Panaviene, Z., Loulergue, C., Dellaporta, S.L., Briat, J.-F., and Walker,**  
595 **E.L.** (2001). Maize yellow stripe1 encodes a membrane protein directly involved in  
596 Fe(III) uptake. *Nature* **409**, 346-349.
- 597 **Dalton, D.A., Joyner, S.L., Becana, M., Iturbe-Ormaetxe, I., and Chatfield, J.M.**  
598 (1998). Antioxidant defenses in the peripheral cell layers of legume root nodules.  
599 *Plant Physiol.* **116**, 37-43.

- 600 **Demsar, J., Curk, T., Erjavec, A., Gorup, C., Hocevar, T., Milutinovic, M., Mozina,**  
601 **M., Polajnar, M., Toplak, M., Staric, A., Stajdohar, M., Umek, L., Zagar, L.,**  
602 **Zbontar, J., Zitnik, M., and Zupan, B.** (2013). Orange: Data mining toolbox in  
603 Python. *J. Machine Learning Res.* **14**, 2349-2353.
- 604 **Downie, J.A.** (2014). Legume nodulation. *Curr. Biol.* **24**, R184-R190.
- 605 **Drakesmith, H., Nemeth, E., and Ganz, T.** (2015). Ironing out Ferroportin. *Cell Metab.*  
606 **22**, 777-787.
- 607 **Durrett, T.P., Gassmann, W., and Rogers, E.E.** (2007). The FRD3-mediated efflux of  
608 citrate into the root vasculature is necessary for efficient iron translocation. *Plant*  
609 *Physiol.* **144**, 197-205.
- 610 **Flis, P., Ouerdane, L., Grillet, L., Curie, C., Mari, S., and Lobinski, R.** (2016).  
611 Inventory of metal complexes circulating in plant fluids: a reliable method based on  
612 HPLC coupled with dual elemental and high-resolution molecular mass  
613 spectrometric detection. *New Phytol.* **211**, 1129-1141.
- 614 **Gage, D.J.** (2002). Analysis of infection thread development using Gfp- and DsRed-  
615 expressing *Sinorhizobium meliloti*. *J. Bacteriol.* **184**, 7042-7046.
- 616 **Goldstein, S., Meyerstein, D., and Czapski, G.** (1993). The Fenton reagents. *Free Radic.*  
617 *Biol. Med.* **15**, 435-445.
- 618 **González-Guerrero, M., Raimunda, D., Cheng, X., and Argüello, J.M.** (2010). Distinct  
619 functional roles of homologous Cu<sup>+</sup> efflux ATPases in *Pseudomonas aeruginosa*.  
620 *Mol. Microbiol.* **78**, 1246-1258.
- 621 **González-Guerrero, M., Matthiadis, A., Sáez, Á., and Long, T.A.** (2014). Fixating on  
622 metals: new insights into the role of metals in nodulation and symbiotic nitrogen  
623 fixation. *Front. Plant Sci.* **5**, 45.
- 624 **González-Guerrero, M., V., E., Sáez, Á., and Tejada-Jiménez, M.** (2016). Transition  
625 metal transport in plants and associated endosymbionts. Arbuscular mycorrhizal  
626 fungi and rhizobia. *Front. Plant Sci.* **7**, 1088.
- 627 **Grillet, L., Lan, P., Li, W., Mokkaapati, G., and Schmidt, W.** (2018). IRON MAN is a  
628 ubiquitous family of peptides that control iron transport in plants. *Nature Plants* **4**,  
629 953-963.

- 630 **Hakoyama, T., Niimi, K., Yamamoto, T., Isobe, S., Sato, S., Nakamura, Y., Tabata, S.,**  
631 **Kumagai, H., Umehara, Y., Brossuleit, K., Petersen, T.R., Sandal, N.,**  
632 **Stougaard, J., Udvardi, M.K., Tamaoki, M., Kawaguchi, M., Kouchi, H., and**  
633 **Suganuma, N.** (2012). The integral membrane protein SEN1 is required for  
634 symbiotic nitrogen fixation in *Lotus japonicus* nodules. *Plant Cell Physiol.* **53**, 225-  
635 236.
- 636 **Hardy, R.W., Holsten, R.D., Jackson, E.K., and Burns, R.C.** (1968). The acetylene-  
637 ethylene assay for n(2) fixation: laboratory and field evaluation. *Plant Physiol.* **43**,  
638 1185-1207.
- 639 **Herridge, D.F., Peoples, M.B., and Boddey, R.M.** (2008). Global inputs of biological  
640 nitrogen fixation in agricultural systems. *Plant Soil* **311**, 1-18.
- 641 **Hirschi, K.D.** (2009). Nutrient Biofortification of Food Crops. *Annu. Rev. Nutr.* **29**, 401-  
642 421.
- 643 **Huisman, R., Ovchinnikova, E., Bisseling, T., and Limpens, E.** (2012). Endocytic  
644 Accommodation of Microbes in Plants (Berlin, Heidelberg: Springer Berlin  
645 Heidelberg), pp. 271-295.
- 646 **Kaiser, B.N., Moreau, S., Castelli, J., Thomson, R., Lambert, A., Bogliolo, S., Puppo,**  
647 **A., and Day, D.A.** (2003). The soybean NRAMP homologue, GmDMT1, is a  
648 symbiotic divalent metal transporter capable of ferrous iron transport. *Plant J.* **35**,  
649 295-304.
- 650 **Kaplan, J.** (2002). Mechanisms of cellular iron acquisition: Another iron in the fire. *Cell*  
651 **111**, 603-606.
- 652 **Kereszt, A., Mergaert, P., and Kondorosi, E.** (2011). Bacteroid development in legume  
653 nodules: Evolution of mutual benefit or of sacrificial victims? *Mol. Plant-Microbe*  
654 *Interact.* **24**, 1300-1309.
- 655 **Kobayashi, T., and Nishizawa, N.K.** (2012). Iron uptake, translocation, and regulation in  
656 higher plants. *Annu. Rev. Plant Biol.* **63**, 131-152.
- 657 **Korshunova, Y.O., Eide, D., Clark, W.G., Guerinot, M.L., and Pakrasi, H.B.** (1999).  
658 The IRT1 protein from *Arabidopsis thaliana* is a metal transporter with a broad  
659 substrate range. *Plant Mol. Biol.* **40**, 37-44.

- 660 **Kryvoruchko, I.S., Routray, P., Sinharoy, S., Torres-Jerez, I., Tejada-Jiménez, M.,**  
661 **Finney, L.A., Nakashima, J., Pislariu, C.I., Benedito, V.A., González-Guerrero,**  
662 **M., Roberts, D.M., and Udvardi, M.K.** (2018). An iron-activated citrate  
663 transporter, MtMATE67, is required for symbiotic nitrogen fixation. *Plant Physiol.*  
664 **176**, 2315-2329.
- 665 **Kumar, R.K., Chu, H.-H., Abundis, C., Vasques, K., Rodriguez, D.C., Chia, J.-C.,**  
666 **Huang, R., Vatamaniuk, O.K., and Walker, E.L.** (2017). Iron-nicotianamine  
667 transporters are required for proper long distance iron signaling. *Plant Physiol.* **175**,  
668 1254.
- 669 **Le Vier, K., Day D.A., and Guerinot M.L.** (1996). Iron uptake by symbiosomes from  
670 soybean root nodules. *Plant Physiol.* **111**, 893-900
- 671 **Li, L., Chen, O.S., Ward, D.M., and Kaplan, J.** (2001). CCC1 is a transporter that  
672 mediates vacuolar iron storage in yeast. *J. Biol. Chem.* **276**, 29515-29519.
- 673 **Limpens, E., Ivanov, S., van Esse, W., Voets, G., Fedorova, E., and Bisseling, T.**  
674 (2009). *Medicago* N<sub>2</sub>-fixing symbiosomes acquire the endocytic identity marker  
675 Rab7 but delay the acquisition of vacuolar identity. *Plant Cell* **21**, 2811-2828.
- 676 **Lin, H., Li, L., Jia, X., Ward, D.M., and Kaplan, J.** (2011). Genetic and biochemical  
677 analysis of high iron toxicity in yeast: Iron toxicity is due to the accumulation of  
678 cytosolic iron and occurs under both aerobic and anaerobic conditions. *J. Biol.*  
679 *Chem.* **286**, 3851-3862.
- 680 **Long, T.A., Tsukagoshi, H., Busch, W., Lahner, B., Salt, D.E., and Benfey, P.N.**  
681 (2010). The bHLH transcription factor POPEYE regulates response to iron  
682 deficiency in Arabidopsis roots. *Plant Cell* **22**, 2219-2236.
- 683 **López-Millán, A.-F., Morales, F.n., Abadía, A., and Abadía, J.** (2000). Effects of iron  
684 deficiency on the composition of the leaf apoplastic fluid and xylem sap in sugar  
685 beet. Implications for iron and carbon transport. *Plant Physiol.* **124**, 873-884.
- 686 **Magne, K., Couzigou, J.-M., Schiessl, K., Liu, S., George, J., Zhukov, V., Sahl, L.,**  
687 **Boyer, F., Iantcheva, A., Mysore, K.S., Wen, J., Citerne, S., Oldroyd, G.E.D.,**  
688 **and Ratet, P.** (2018). *MtNODULE ROOT1* and *MtNODULE ROOT2* are essential  
689 for indeterminate nodule identity. *Plant Physiol.* **178**, 295.
- 690 **Marschner, P.** (2011). *Mineral Nutrition of Higher Plants* 3rd Edition. (Academic Press).

- 691 **McKie, A.T., Marciani, P., Rolfs, A., Brennan, K., Wehr, K., Barrow, D., Miret, S.,**  
692 **Bomford, A., Peters, T.J., Farzaneh, F., Hediger, M.A., Hentze, M.W., and**  
693 **Simpson, R.J.** (2000). A novel duodenal Iron-Regulated transporter, IREG1,  
694 implicated in the basolateral transfer of iron to the circulation. *Mol. Cell* **5**, 299-309.
- 695 **Montiel, J., Arthikala, M.-K., Cárdenas, L., and Quinto, C.** (2016). Legume NADPH  
696 oxidases have crucial roles at different stages of nodulation. *Int. J. Mol. Sci.* **17**,  
697 680.
- 698 **Montiel, J., Nava, N., Cárdenas, L., Sánchez-López, R., Arthikala, M.-K., Santana, O.,**  
699 **Sánchez, F., and Quinto, C.** (2012). A *Phaseolus vulgaris* NADPH oxidase gene is  
700 required for root infection by rhizobia. *Plant Cell Physiol.* **53**, 1751-1767.
- 701 **Moreau, S., Meyer J.M., and Puppo A.** (1995). Uptake of iron by symbiosomes and  
702 bacteroids from soybean nodules. *FEBS Lett.* **361**, 225-228.
- 703 **Morrissey, J., Baxter, I.R., Lee, J., Li, L., Lahner, B., Grotz, N., Kaplan, J., Salt, D.E.,**  
704 **and Guerinot, M.L.** (2009). The ferroportin metal efflux proteins function in iron  
705 and cobalt homeostasis in Arabidopsis. *Plant Cell* **21**, 3326-3338.
- 706 **Mus, F., Crook, M.B., Garcia, K., Garcia Costas, A., Geddes, B.A., Kouri, E.D.,**  
707 **Paramasivan, P., Ryu, M.H., Oldroyd, G.E., Poole, P.S., Udvardi, M.K., Voigt,**  
708 **C.A., Ane, J.M., and Peters, J.W.** (2016). Symbiotic nitrogen fixation and  
709 challenges to extending it to non-legumes. *Appl. Environ. Microbiol.* **82**, 3698-  
710 3710.
- 711 **Nakagawa, T., Kurose, T., Hino, T., Tanaka, K., Kawamukai, M., Niwa, Y., Toyooka,**  
712 **K., Matsuoka, K., Jinbo, T., and Kimura, T.** (2007). Development of series of  
713 gateway binary vectors, pGWBs, for realizing efficient construction of fusion genes  
714 for plant transformation. *J. Biosci. Bioeng.* **104**, 34-41.
- 715 **Nevo, Y., and Nelson, N.** (2006). The NRAMP family of metal-ion transporters. *Biochim.*  
716 *Biophys. Acta* **1763**, 609-620.
- 717 **O'Hara, G.W., Dilworth, M.J., Boonkerd, N., and Parkpian, P.** (1988). Iron-deficiency  
718 specifically limits nodule development in peanut inoculated with *Bradyrhizobium*  
719 *sp.* *New Phytologist* **108**, 51-57.
- 720 **Oldroyd, G.E., and Dixon, R.** (2014). Biotechnological solutions to the nitrogen problem.  
721 *Curr. Opin. Biotechnol.* **26**, 19-24.



- 722 **Preisig, O., Zufferey, R., and Hennecke, H.** (1996a). The *Bradyrhizobium japonicum*  
723 fixGHIS genes are required for the formation of the high-affinity cbb(3)-type  
724 cytochrome oxidase. Arch. Microbiol. **165**, 297-305.
- 725 **Preisig, O., Zufferey, R., Thony-Meyer, L., Appleby, C., and Hennecke, H.** (1996b). A  
726 high-affinity cbb3-type cytochrome oxidase terminates the symbiosis- specific  
727 respiratory chain of *Bradyrhizobium japonicum*. J. Bacteriol. **178**, 1532-1538.
- 728 **Rodríguez-Haas, B., Finney, L., Vogt, S., González-Melendi, P., Imperial, J., and**  
729 **González-Guerrero, M.** (2013). Iron distribution through the developmental stages  
730 of *Medicago truncatula* nodules. Metallomics **5**, 1247-1253.
- 731 **Rogers, E.E., and Guerinot, M.L.** (2002). FRD3, a member of the multidrug and toxin  
732 efflux family, controls iron deficiency responses in Arabidopsis. Plant Cell **14**,  
733 1787-1799.
- 734 **Roschzttardt, H., Séguéla-Arnaud, M., Briat, J.-F., Vert, G., and Curie, C.** (2011).  
735 The FRD3 citrate effluxer promotes iron nutrition between symplastically  
736 disconnected tissues throughout Arabidopsis development. Plant Cell **23**, 2725-  
737 2737.
- 738 **Roux, B., Rodde, N., Jardinaud, M.-F., Timmers, T., Sauviac, L., Cottret, L., Carrère,**  
739 **S., Sallet, E., Courcelle, E., Moreau, S., Debellé, F., Capela, D., de Carvalho-**  
740 **Niebel, F., Gouzy, J., Bruand, C., and Gamas, P.** (2014). An integrated analysis  
741 of plant and bacterial gene expression in symbiotic root nodules using laser-capture  
742 microdissection coupled to RNA sequencing. Plant J. **77**, 817-837.
- 743 **Rubio, L.M., and Ludden, P.W.** (2005). Maturation of nitrogenase: a biochemical puzzle.  
744 J. Bacteriol. **187**, 405-414.
- 745 **Rubio, M.C., James, E.K., Clemente, M.R., Bucciarelli, B., Fedorova, M., Vance, C.P.,**  
746 **and Becana, M.** (2004). Localization of superoxide dismutases and hydrogen  
747 peroxide in legume root nodules. Mol. Plant Microbe Int. **17**, 1294-1305.
- 748 **Schiestl, R.H., and Gietz, R.D.** (1989). High efficiency transformation of intact yeast cells  
749 using single stranded nucleic acids as carrier. Curr. Genet. **16**, 339-346.
- 750 **Sivitz, A.B., Hermand, V., Curie, C., and Vert, G.** (2012). Arabidopsis bHLH100 and  
751 bHLH101 control iron homeostasis via a FIT-independent pathway. PLoS ONE **7**,  
752 e44843.

- 753 **Solé, V. A., Papillon, E., Cotte, M., Walter, P., Susini, J. A.** (2007). A multiplatform  
754 code for the analysis of energy-dispersive X-ray fluorescence spectra  
755 *Spectrochimica Acta Part B: Atomic Spectroscopy* **62**, 63-68.
- 756 **Sprent, J.I.** (2007). Evolving ideas of legume evolution and diversity: a taxonomic  
757 perspective on the occurrence of nodulation. *New Phytol.* **174**, 11-25.
- 758 **Stephens, B., Cook, D., and Grusak, M.** (2011). Characterization of zinc transport by  
759 divalent metal transporters of the ZIP family from the model legume *Medicago*  
760 *truncatula*. *Biometals* **24**, 51-58.
- 761 **Sutton, W.D., Pankhurst, C.E., and Craig, A.S.** (1981). The Rhizobium Bacteroid State.  
762 In *Biology of the Rhizobiaceae*, K.L. Atherly and G. Gilesalan, eds (Academic  
763 Press CY -), pp. 149-177.
- 764 **Tadege, M., Wen, J., He, J., Tu, H., Kwak, Y., Eschstruth, A., Cayrel, A., Endre, G.,**  
765 **Zhao, P.X., Chabaud, M., Ratet, P., and Mysore, K.S.** (2008). Large-scale  
766 insertional mutagenesis using the Tnt1 retrotransposon in the model legume  
767 *Medicago truncatula*. *Plant J.* **54**, 335-347.
- 768 **Tang, C., Robson, A.D., and Dilworth, M.J.** (1990). The role of iron in nodulation and  
769 nitrogen fixation in *Lupinus angustifolius* L. *New Phytol.* **114**, 173-182.
- 770 **Tang, C.X., Robson, A.D., Dilworth, M.J., and Kuo, J.** (1992). Microscopic evidence on  
771 how iron-deficiency limits nodule initiation in *Lupinus angustifolius* L. *New Phytol.*  
772 **121**, 457-467.
- 773 **Tejada-Jiménez, M., Castro-Rodríguez, R., Kryvoruchko, I., Lucas, M.M., Udvardi,**  
774 **M., Imperial, J., and González-Guerrero, M.** (2015). *Medicago truncatula*  
775 Natural Resistance-Associated Macrophage Protein1 is required for iron uptake by  
776 rhizobia-infected nodule cells. *Plant Physiol.* **168**, 258-272.
- 777 **Tejada-Jiménez, M., Gil-Diez, P., Leon-Mediavilla, J., Wen, J., Mysore, K.S.,**  
778 **Imperial, J., and Gonzalez-Guerrero, M.** (2017). *Medicago truncatula*  
779 molybdate transporter type 1 (MOT1.3) is a plasma membrane molybdenum  
780 transporter required for nitrogenase activity in root nodules under molybdenum  
781 deficiency. *New Phytol* **216**, 1223-1235.

- 782 **Terry, R.E., Soerensen, K.U., Jolley, V.D., and Brown, J.C.** (1991). The role of active  
783 *Bradyrhizobium japonicum* in iron stress response of soy-beans. *Plant Soil* **130**,  
784 225-230.
- 785 **Udvardi, M., and Poole, P.S.** (2013). Transport and metabolism in legume-rhizobia  
786 symbioses. *Annu. Rev. Plant Biol.* **64**, 781-805.
- 787 **Vance, C.P.** (2001). Symbiotic nitrogen fixation and phosphorus acquisition. *Plant*  
788 *nutrition in a world of declining renewable resources.* *Plant Physiol.* **127**, 390-397.
- 789 **Vasse, J., de Billy, F., Camut, S., and Truchet, G.** (1990). Correlation between  
790 ultrastructural differentiation of bacteroids and nitrogen fixation in alfalfa nodules.  
791 *J. Bacteriol.* **172**, 4295-4306.
- 792 **Vernié, T., Kim, J., Frances, L., Ding, Y., Sun, J., Guan, D., Niebel, A., Gifford, M.L.,**  
793 **de Carvalho-Niebel, F., and Oldroyd, G.E.D.** (2015). The NIN transcription  
794 factor coordinates diverse nodulation programs in different tissues of the *Medicago*  
795 *truncatula* root. *Plant Cell*, **27**, 3410-3420.
- 796 **Vernoud, V., Journet, E.P., and Barker, D.G.** (1999). *MtENOD20*, a Nod factor-  
797 inducible molecular marker for root cortical cell activation. *Mol. Plant Microbe*  
798 *Interact.* **12**, 604-614.
- 799 **Vert, G., Grotz, N., Dedaldéchamp, F., Gaymard, F., Guerinot, M.L., Briat, J.F., and**  
800 **Curie, C.** (2002). IRT1, an *Arabidopsis* transporter essential for iron uptake from  
801 the soil and the plant growth. *Plant Cell* **14**, 1223-1233.
- 802 **von Wiren, N., Klair, S., Bansal, S., Briat, J.-F., Khodr, H., Shioiri, T., Leigh, R.A.,**  
803 **and Hider, R.C.** (1999). Nicotianamine chelates both FeIII and FeII. Implications  
804 for metal transport in plants. *Plant Physiol.* **119**, 1107-1114.
- 805 **White, P.J., and Broadley, M.R.** (2009). Biofortification of crops with seven mineral  
806 elements often lacking in human diets - iron, zinc, copper, calcium, magnesium,  
807 selenium and iodine. *New Phytol.* **182**, 49-84.
- 808 **Xiao, T.T., Schilderink, S., Moling, S., Deinum, E.E., Kondorosi, E., Franssen, H.,**  
809 **Kulikova, O., Niebel, A., and Bisseling, T.** (2014). Fate map of *Medicago*  
810 *truncatula* root nodules. *Development* **141**, 3517-3528.
- 811 **Zhai, Z., Gayomba, S.R., Jung, H.-i., Vimalakumari, N.K., Piñeros, M., Craft, E.,**  
812 **Rutzke, M.A., Danku, J., Lahner, B., Punshon, T., Guerinot, M.L., Salt, D.E.,**

813 **Kochian, L.V., and Vatamaniuk, O.K.** (2014). OPT3 Is a phloem-specific iron  
814 transporter that is essential for systemic iron signaling and redistribution of iron and  
815 cadmium in *Arabidopsis*. *Plant Cell* **26**, 2249-2264.

816

817

818

819

820

821

## 822 **FIGURE LEGENDS**

823 **Figure 1.** *MtFPN2* is expressed in the vasculature and in the differentiation-fixation zones  
824 of *M. truncatula* nodules. (A) *MtFPN2* expression in nodulated or nitrogen-fertilized *M.*  
825 *truncatula* plants relative to the internal standard gene *Ubiquitin carboxyl-terminal*  
826 *hydrolase*. Data are the mean  $\pm$  SE of two independent experiments with 4 pooled plants.  
827 (B) GUS staining of 28 dpi *M. truncatula* nodules expressing the *gus* gene under the  
828 control of *MtFPN2* promoter region. Bar = 500  $\mu$ m. (C) Longitudinal section of a GUS-  
829 stained 28 dpi *M. truncatula* nodule expressing the *gus* gene under the *MtFPN2* promoter  
830 region. ZI indicates Zone I; ZII, Zone II; IZ, Interzone; and ZIII, Zone III. Bar = 100  $\mu$ m.  
831 (D) Cross section of a GUS-stained 28 dpi *M. truncatula* nodule expressing the *gus* gene  
832 under the *MtFPN2* promoter region. Bar = 100  $\mu$ m.

833 **Figure 2.** *MtFPN2* is localized in intracellular membranes in the vasculature and in the  
834 symbiosome membrane in *S. meliloti*-infected nodule cells. (A) Longitudinal section of a  
835 28 dpi *M. truncatula* nodule expressing *MtFPN2-HA* under its own promoter. The three C-  
836 terminal HA epitopes were detected using an Alexa594-conjugated antibody (red, left  
837 panel). Transformed plants were inoculated with a GFP-expressing *S. meliloti* strain (green,  
838 middle panel). Both images were overlaid with the channel showing DAPI-stained DNA  
839 (blue, right panel). Bar = 100  $\mu$ m. (B) Cross section of a vessel of 28 dpi *M. truncatula*  
840 nodule expressing *MtFPN2-HA* under its own promoter. The three C-terminal HA epitopes

841 were detected using an Alexa594-conjugated antibody (red, left panel). Transillumination  
842 image is shown in the centre panel, and overlaid with the Alexa594 signal (right panel). Bar  
843 = 25  $\mu$ m. (C) Detail of a *S. meliloti*-colonized 28 dpi nodule cell in the differentiation zone.  
844 Right panel shows the Alexa594 signal (red), middle panel the *S. meliloti* distribution  
845 (green), and the right one overlays both images. Bar = 10  $\mu$ m. (D). Detail of symbiosomes  
846 shown by transmission electron microscopy (left panel). Arrows indicate the position of the  
847 colloidal gold particles conjugated to the antibody used to detect MtFPN2-HA. Middle  
848 panel, *M. truncatula* nodule vessel shown with transmission electron microscopy. Asterisks  
849 indicate the position of the xylem. Boxed region was amplified in the right panel to show  
850 the antibody-conjugated gold particles used to position MtFPN2-HA (indicated by arrows).

851 **Figure 3.** MtFPN2 transports iron out of the cytosol. Parental yeast strain DY150 was  
852 transformed with the pDR196 empty vector, while the *ccc1* mutant was transformed with  
853 either pDR196 or pDR196 harbouring the *MtFPN2* coding sequence. Serial dilutions (10x)  
854 of the transformants were grown in YPD medium (top panel), SD medium with the  
855 required auxotrophies (centre panel), or in SD medium with the required auxotrophies and  
856 2.5 mM FeSO<sub>4</sub> (lower panel).

857 **Figure 4.** MtFPN2 is required for symbiotic nitrogen fixation. (A) *Tnt1* insertion in the  
858 fourth exon of *MtFPN2* results in no expression being detected by RT-PCR. The *Ubiquitin*  
859 *carboxyl-terminal hydrolase* (MtUb1) gene was used as a positive control. (B) Growth of  
860 representative wild type (WT), *fpn2-1*, and *fpn2-1* transformed with the *MtFPN2* coding  
861 sequence expressed under its own promoter (*FPN2<sub>prom</sub>::MtFPN2*). Bar = 1 cm. (C) Detail  
862 of representative nodules of WT, *fpn2-1*, and *FPN2<sub>prom</sub>::MtFPN2*-transformed *fpn2-1*  
863 plants. Bars = 500  $\mu$ m. (D) Number of pink or white nodules in 28 dpi WT, *fpn2-1*, and  
864 *FPN2<sub>prom</sub>::MtFPN2*-transformed *fpn2-1* plants. Data are the mean  $\pm$  SE of at least 7  
865 independently transformed plants. (E) Fresh weight of WT, *fpn2-1*, and  
866 *FPN2<sub>prom</sub>::MtFPN2*-transformed *fpn2-1* plants. Data are the mean  $\pm$  SE of at least 7  
867 independently transformed plants. (F) Nitrogenase activity in 28 dpi nodules from WT,  
868 *fpn2-1*, and *FPN2<sub>prom</sub>::MtFPN2*-transformed *fpn2-1* plants. Acetylene reduction was  
869 measured in duplicate from two sets of four pooled plants. Data are the mean  $\pm$  SE. (G)  
870 Iron content in roots, shoot, and nodules of 28 dpi WT, *fpn2-1*, and *FPN2<sub>prom</sub>::MtFPN2*-

871 transformed *fpn2-1* plants. Data are the mean  $\pm$  SE of 3 sets of 4 pooled plants. \* indicates  
872 statistically significant differences ( $p < 0.05$ ).

873 **Figure 5.** *MtFPN2* loss-of-function alters iron distribution and speciation in 28 dpi nodules.  
874 (A). Synchrotron-based X-ray fluorescence images of wild type (left), pink *fpn2-1* (middle),  
875 and white *fpn2-1* (right) nodules, showing calcium (top panels) or iron (lower panels)  
876 distribution. Bars = 200  $\mu$ m, intensity scale in mass fraction units (g/g). (B) XANES  
877 spectra obtained from different regions of wild-type, pink *fpn2-1*, and white *fpn2-1* nodules  
878 (top left panel). This signal was decomposed into its two principal components for Zone II  
879 (top right panel), Zone III (lower left panel), and the vasculature (lower right panel). Green  
880 represents wild-type samples; red, pink *fpn2-1*; and blue, white *fpn2-1* nodules.

881 **Figure 6.** *MtFPN2* expression in cortical nodule cells partially restores the *fpn2-1*  
882 phenotype. (A) Growth of representative wild type (WT), *fpn2-1*, and *fpn2-1* transformed  
883 with the *MtFPN2* coding sequence expressed under the *MtMOT1.3* promoter  
884 (*MOT1.3<sub>prom</sub>::MtFPN2*). Bar = 1 cm. (B) Detail of representative nodules of WT, *fpn2-1*,  
885 and *MOT1.3<sub>prom</sub>::MtFPN2*-transformed *fpn2-1* plants. Bars = 500  $\mu$ m. (C) Number of pink  
886 or white nodules in 28 dpi WT, *fpn2-1*, and *MOT1.3<sub>prom</sub>::MtFPN2*-transformed *fpn2-1*  
887 plants. Data are the mean  $\pm$  SE of at least 11 independently transformed plants. (D) Fresh  
888 weight of WT, *fpn2-1*, and *MOT1.3<sub>prom</sub>::MtFPN2*-transformed *fpn2-1* plants. Data are the  
889 mean  $\pm$  SE of at least 11 independently transformed plants. (E) Nitrogenase activity in 28  
890 dpi nodules from WT, *fpn2-1*, and *MOT1.3<sub>prom</sub>::MtFPN2*-transformed *fpn2-1* plants.  
891 Acetylene reduction was measured in duplicate from two sets of four pooled plants. Data  
892 are the mean  $\pm$  SE. \* indicates statistically significant differences ( $p < 0.05$ ).

## FIGURE 1

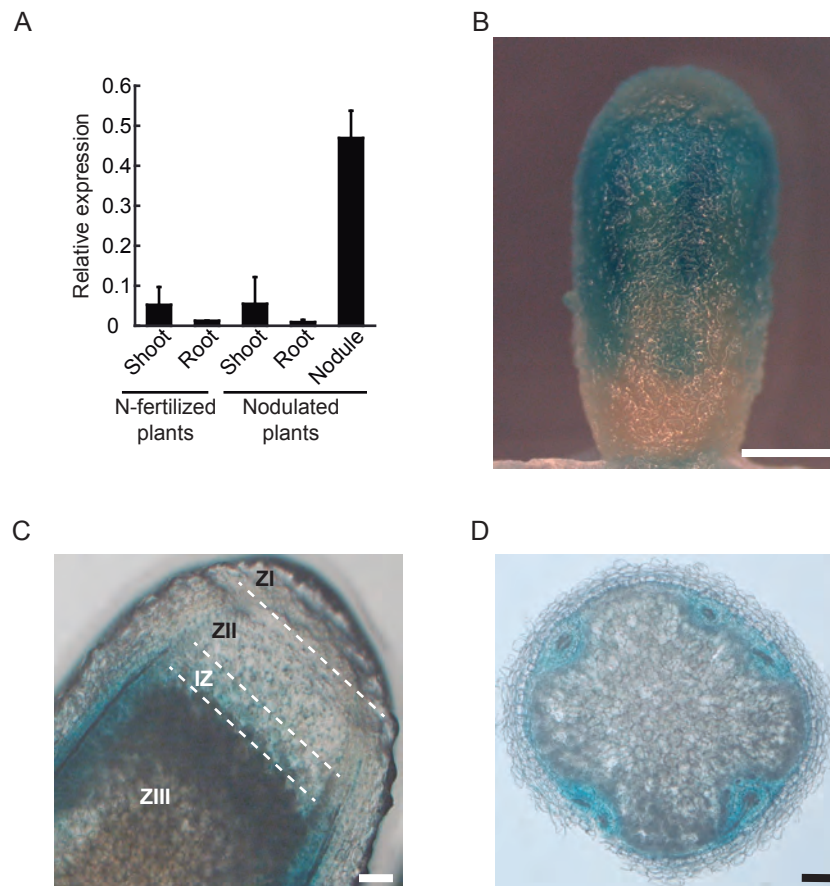

**Figure 1.** *MtFPN2* is expressed in the vasculature and in the differentiation-fixation zones of *M. truncatula* nodules. (A) *MtFPN2* expression in nodulated or nitrogen-fertilized *M. truncatula* plants relative to the internal standard gene *Ubiquitin carboxyl-terminal hydrolase*. Data are the mean  $\pm$  SE of two independent experiments with 4 pooled plants. (B) GUS staining of 28 dpi *M. truncatula* nodules expressing the *gus* gene under the control of *MtFPN2* promoter region. Bar = 500  $\mu$ m. (C) Longitudinal section of a GUS-stained 28 dpi *M. truncatula* nodule expressing the *gus* gene under the *MtFPN2* promoter region. ZI indicates Zone I; ZII, Zone II; IZ, Interzone; and ZIII, Zone III. Bar = 100  $\mu$ m. (D) Cross section of a GUS-stained 28 dpi *M. truncatula* nodule expressing the *gus* gene under the *MtFPN2* promoter region. Bar = 100  $\mu$ m.

A

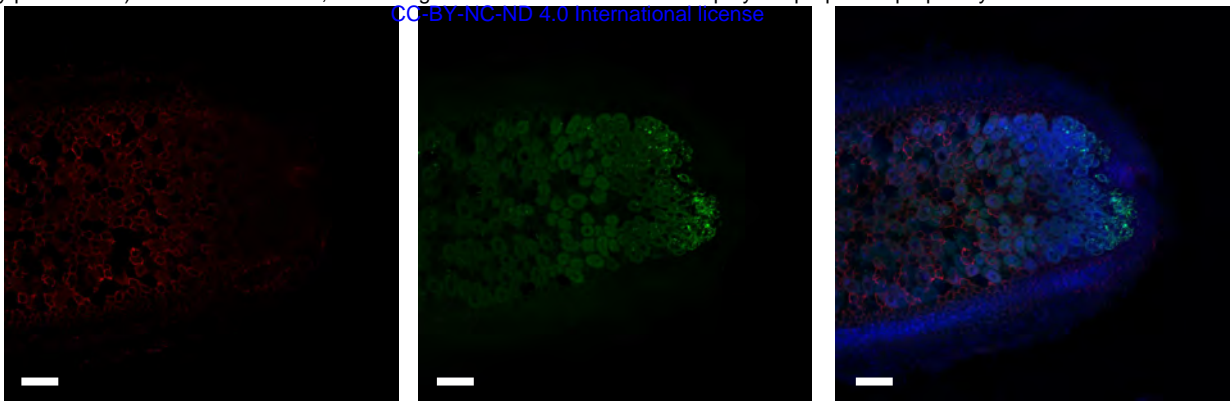

B

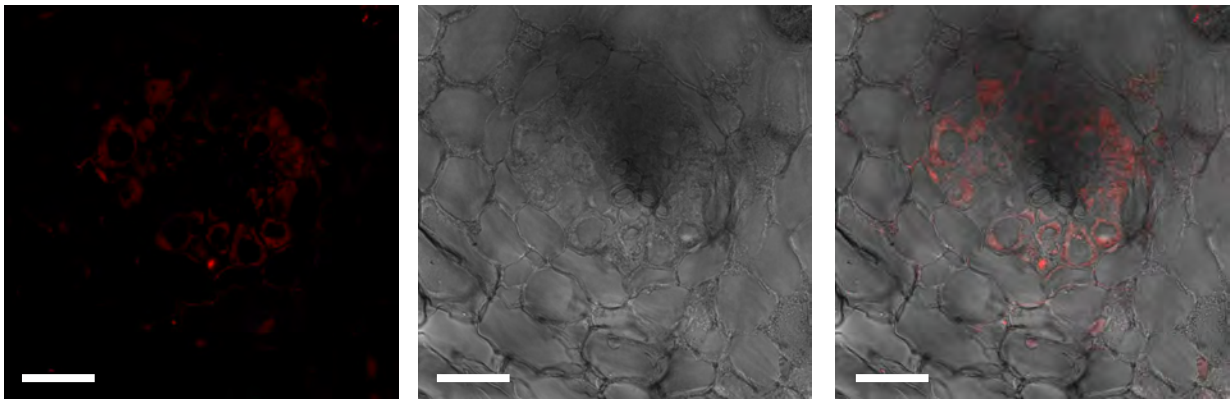

C

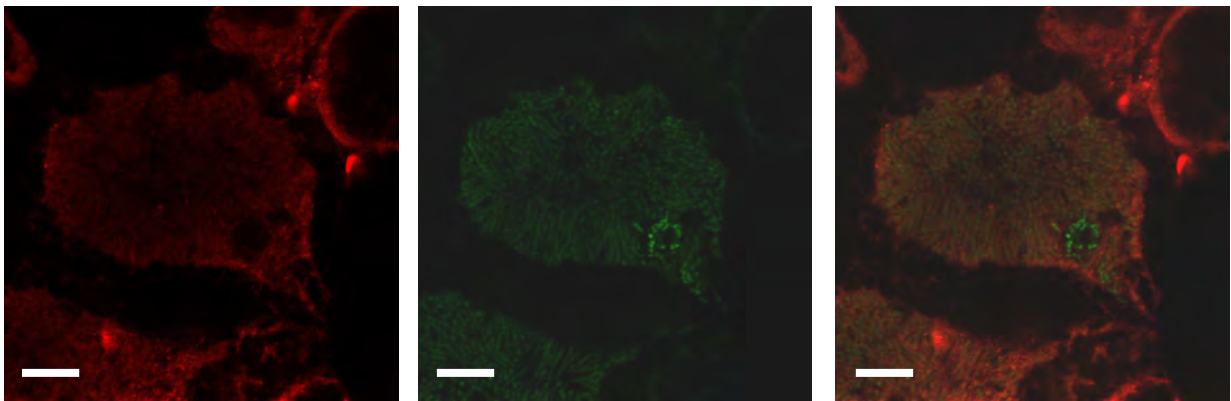

D

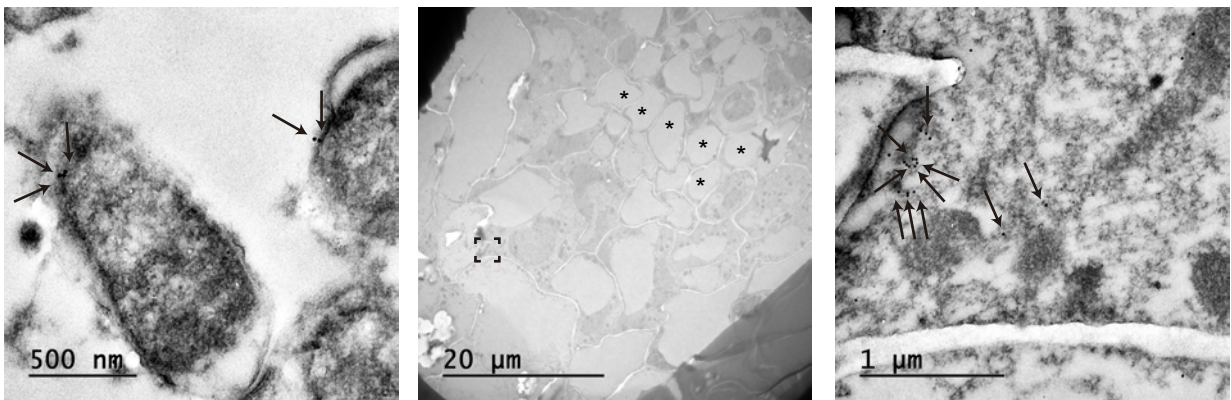

**Figure 2.** MtFPN2 is localized in intracellular membranes in the vasculature and in the symbiosome membrane in *S. meliloti*-infected nodule cells. (A) Longitudinal section of a 28 dpi *M. truncatula* nodule expressing *MtFPN2-HA* under its own promoter. The three C-terminal HA epitopes were detected using an Alexa594-conjugated antibody (red, left panel). Transformed plants were inoculated with a GFP-expressing *S. meliloti* strain (green, middle panel). Both images were overlaid with the channel showing DAPI-stained DNA (blue, right panel). Bar=100  $\mu$ m. (B) Cross section of a vessel of 28 dpi *M. truncatula* nodule expressing *MtFPN2-HA* under its own promoter. The three C-terminal HA epitopes were detected using an Alexa594-conjugated antibody (red, left panel). Transillumination image is shown in the centre panel, and overlaid with the Alexa594 signal (right panel). Bar = 25  $\mu$ m. (C) Detail of a *S. meliloti*-colonized 28 dpi nodule cell in the differentiation zone. Right panel shows the Alexa594 signal (red), middle panel the *S. meliloti* distribution (green), and the right one overlays both images. Bar = 10  $\mu$ m. (D). Detail of symbiosomes shown by transmission electron microscopy (left panel). Arrows indicate the position of the colloidal gold particles conjugated to the antibody used to detect MtFPN2-HA. Middle panel, *M. truncatula* nodule vessel shown with transmission electron microscopy. Asterisks indicate the position of the xylem. Boxed region was amplified in the right panel to show the antibody-conjugated gold particles used to position MtFPN2-HA (indicated by arrows).



### FIGURE 3

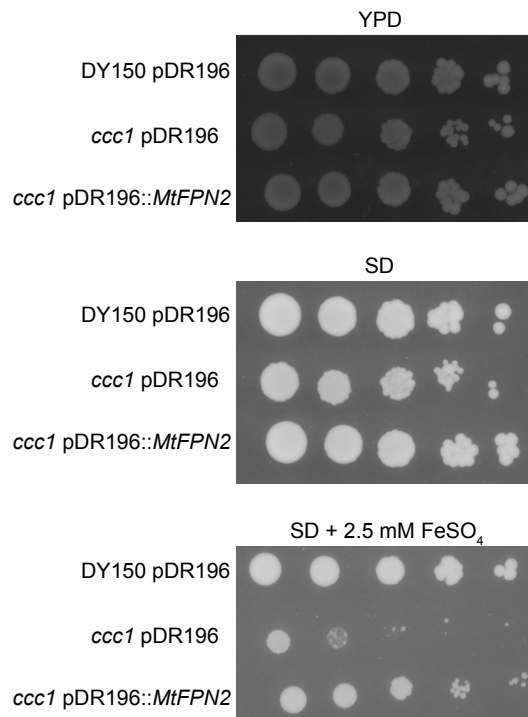

**Figure 3.** *MtFPN2* transports iron out of the cytosol. Parental yeast strain DY150 was transformed with the pDR196 empty vector, while the *ccc1* mutant was transformed with either pDR196 or pDR196 harbouring the *MtFPN2* coding sequence. Serial dilutions (10x) of the transformants were grown in YPD medium (top panel), SD medium with the required auxotrophies (centre panel), or in SD medium with the required auxotrophies and 2.5 mM FeSO<sub>4</sub> (lower panel).

## FIGURE 4

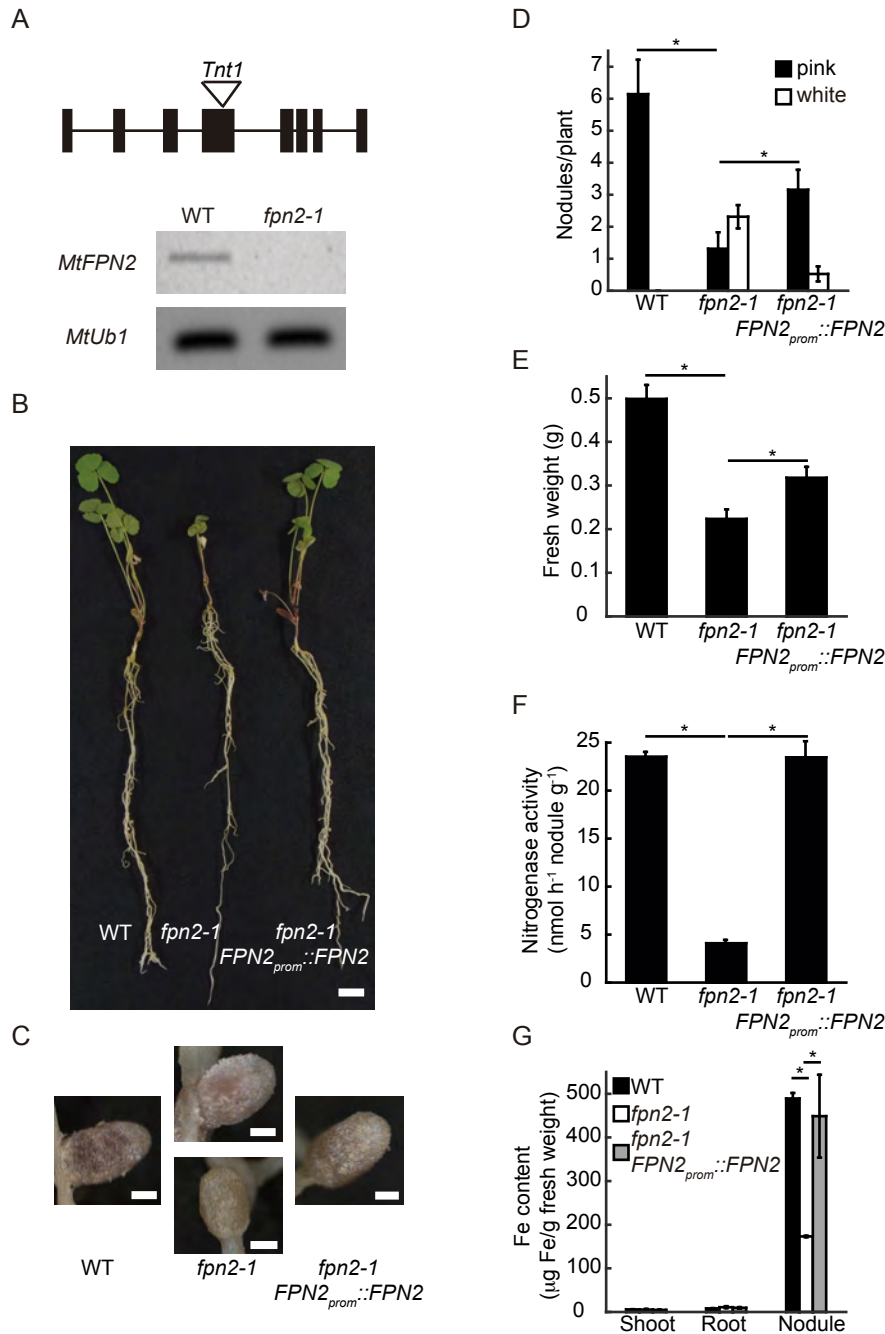

**Figure 4.** MtFPN2 is required for symbiotic nitrogen fixation. (A) *Tnt1* insertion in the fourth exon of *MtFPN2* results in no expression being detected by RT-PCR. The *Ubiquitin carboxyl-terminal hydrolase* (*MtUb1*) gene was used as a positive control. (B) Growth of representative wild type (WT), *fpn2-1*, and *fpn2-1* transformed with the *MtFPN2* coding sequence expressed under its own promoter (*FPN2<sub>prom</sub>::MtFPN2*). Bar = 1 cm. (C) Detail of representative nodules of WT, *fpn2-1*, and *FPN2<sub>prom</sub>::MtFPN2*-transformed *fpn2-1* plants. Bars = 500  $\mu$ m. (D) Number of pink or white nodules in 28 dpi WT, *fpn2-1*, and *FPN2<sub>prom</sub>::MtFPN2*-transformed *fpn2-1* plants. Data are the mean  $\pm$  SE of at least 7 independently transformed plants. (E) Fresh weight of WT, *fpn2-1*, and *FPN2<sub>prom</sub>::MtFPN2*-transformed *fpn2-1* plants. Data are the mean  $\pm$  SE of at least 7 independently transformed plants. (F) Nitrogenase activity in 28 dpi nodules from WT, *fpn2-1*, and *FPN2<sub>prom</sub>::MtFPN2*-transformed *fpn2-1* plants. Acetylene reduction was measured in duplicate from two sets of four pooled plants. Data are the mean  $\pm$  SE. (G) Iron content in roots, shoot, and nodules of 28 dpi WT, *fpn2-1*, and *FPN2<sub>prom</sub>::MtFPN2*-transformed *fpn2-1* plants. Data are the mean  $\pm$  SE of 3 sets of 4 pooled plants. \* indicates statistically significant differences ( $p < 0.05$ ).

A

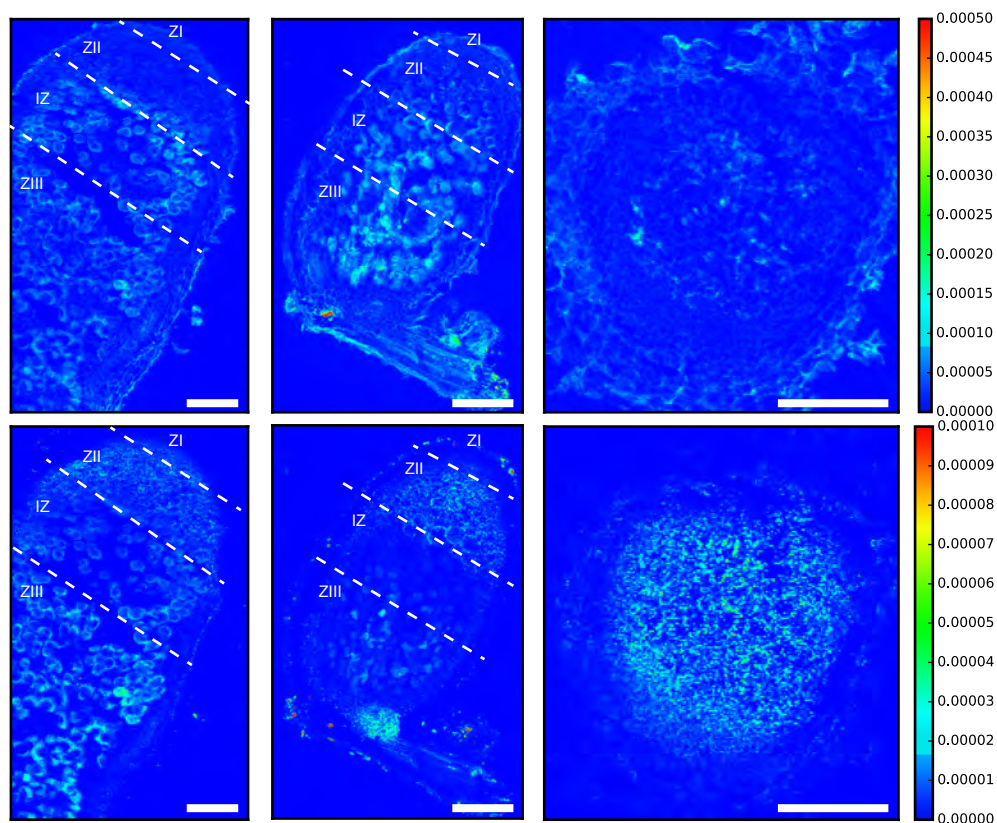

B

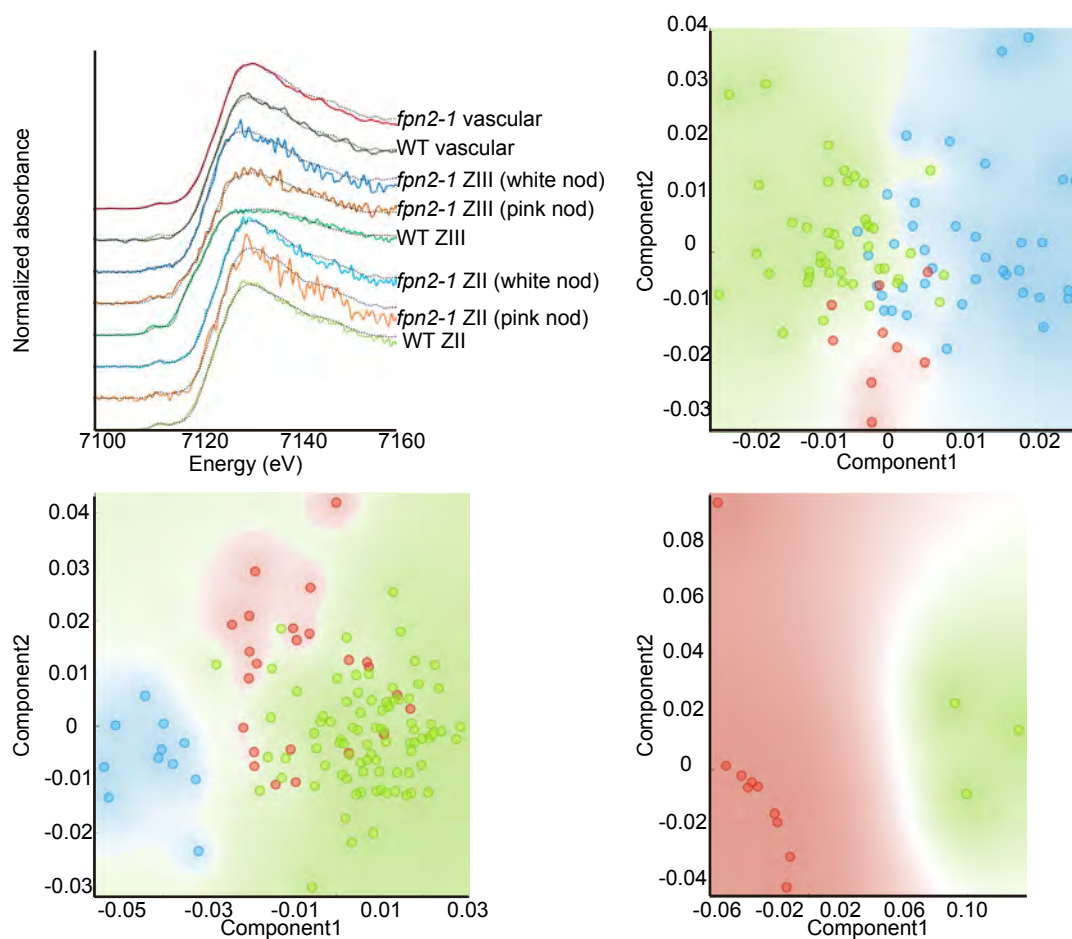

**Figure 5.** *MtFPN2* loss-of-function alters iron distribution and speciation in 28 dpi nodules. (A). Synchrotron-based X-ray fluorescence images of wild type (left), pink *fpn2-1* (middle), and white *fpn2-1* (right) nodules, showing calcium (top panels) or iron (lower panels) distribution. Bars = 200  $\mu$ m, intensity scale in mass fraction units (g/g). (B) XANES spectra obtained from different regions of wild-type, pink *fpn2-1*, and white *fpn2-1* nodules (top left panel). This signal was decomposed into its two principal components for Zone II (top right panel), Zone III (lower left panel), and the vasculature (lower right panel). Green represents wild-type samples; red, pink *fpn2-1*; and blue, white *fpn2-1* nodules.

## FIGURE 6

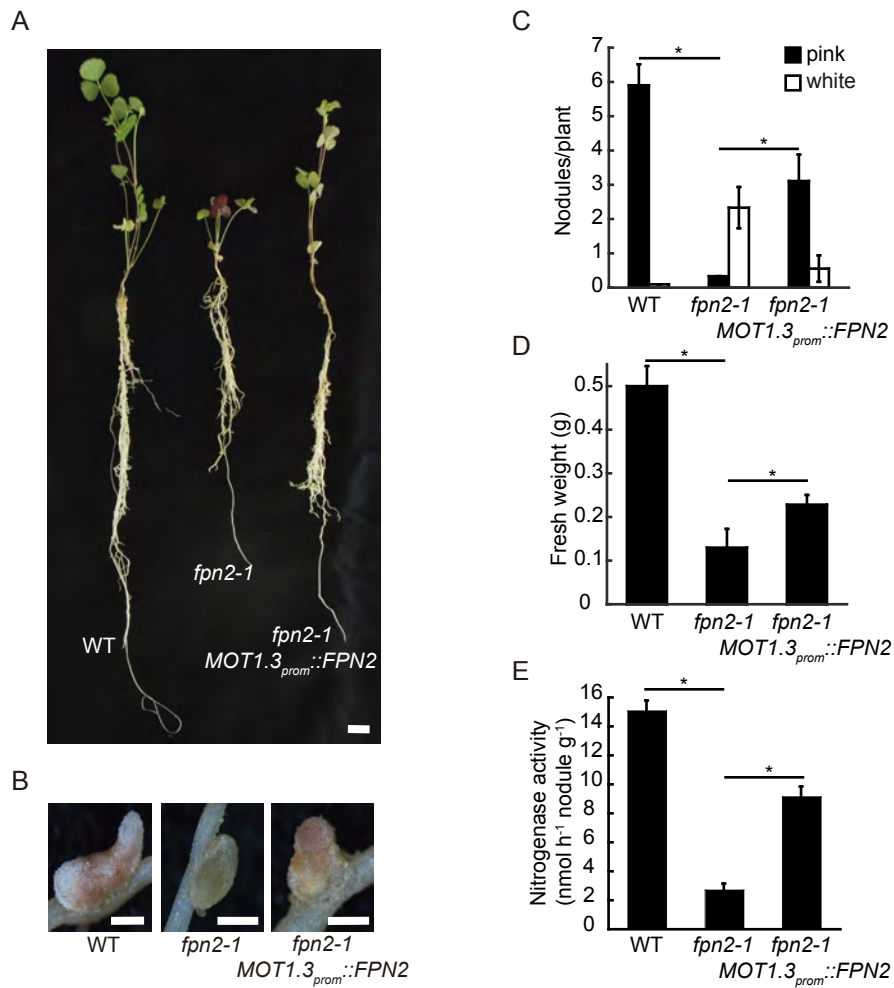

**Figure 6.** *MtFPN2* expression in cortical nodule cells partially restores the *fpn2-1* phenotype. (A) Growth of representative wild type (WT), *fpn2-1*, and *fpn2-1* transformed with the *MtFPN2* coding sequence expressed under the *MtMOT1.3* promoter (*MOT1.3<sub>prom</sub>::MtFPN2*). Bar = 1 cm. (B) Detail of representative nodules of WT, *fpn2-1*, and *MOT1.3<sub>prom</sub>::MtFPN2*-transformed *fpn2-1* plants. Bars = 500  $\mu$ m. (C) Number of pink or white nodules in 28 dpi WT, *fpn2-1*, and *MOT1.3<sub>prom</sub>::MtFPN2*-transformed *fpn2-1* plants. Data are the mean  $\pm$  SE of at least 11 independently transformed plants. (D) Fresh weight of WT, *fpn2-1*, and *MOT1.3<sub>prom</sub>::MtFPN2*-transformed *fpn2-1* plants. Data are the mean  $\pm$  SE of at least 11 independently transformed plants. (E) Nitrogenase activity in 28 dpi nodules from WT, *fpn2-1*, and *MOT1.3<sub>prom</sub>::MtFPN2*-transformed *fpn2-1* plants. Acetylene reduction was measured in duplicate from two sets of four pooled plants. Data are the mean  $\pm$  SE. \* indicates statistically significant differences ( $p < 0.05$ ).
